# Whole-Genome Sequencing and Comparative Genomic Analysis of Potential Biotechnological Strains from *Trichoderma harzianum*, *Trichoderma atroviride*, and *Trichoderma reesei*

Rafaela Rossi Rosolen<sup>1,2</sup>, Maria Augusta Crivelente Horta<sup>1,4</sup>, Paulo Henrique Campiteli de Azevedo<sup>1,2</sup>, Carla Cristina da Silva<sup>1</sup>, Danilo Augusto Sforca<sup>1</sup>, Gustavo Henrique Goldman<sup>4</sup>, and Anete Pereira de Souza<sup>1,3\*</sup>

<sup>1</sup>Center for Molecular Biology and Genetic Engineering (CBMEG), University of Campinas (UNICAMP), Cidade Universitária Zeferino Vaz, Campinas, SP, Brazil

<sup>2</sup>Graduate Program in Genetics and Molecular Biology, Institute of Biology, UNICAMP, Campinas, SP, Brazil

<sup>3</sup>Department of Plant Biology, Institute of Biology, UNICAMP, Cidade Universitária Zeferino Vaz, Rua Monteiro Lobato, Campinas, SP, Brazil

<sup>4</sup>Faculty of Pharmaceutical Sciences of Ribeirão Preto, University of São Paulo (USP), Ribeirão Preto, SP, Brazil

## \* Correspondence:

Anete Pereira de Souza

anete@unicamp.br

**Number of words:** 5644

**Number of figures:** 7

**Number of tables:** 3

**Keywords:** *Trichoderma*, genomes, comparative analysis, orthology analysis, structural variant analysis

## Abstract

Fungi of the genus *Trichoderma* exhibit high genetic diversity and can thus be utilized in a large range of biotechnological applications. While *Trichoderma reesei* is the primary source of industrial enzymatic cocktails, *Trichoderma atroviride* and *Trichoderma harzianum* are widely used as commercial biocontrol agents against plant diseases. Recently, *T. harzianum* IOC-3844 (Th3844) and *T. harzianum* CBMAI-0179 (Th0179) demonstrated great potential in the enzymatic conversion of lignocellulose into fermentable sugars. Despite such potential, the genomes of both hydrolytic strains remain unclear. Herein, we performed whole-genome sequencing and assembly of Th3844 and Th0179 strains. To assess the genetic diversity within the genus *Trichoderma*, the results of both strains were compared with those from *T. atroviride* CBMAI-00020 (Ta0020) and *T. reesei* CBMAI-0711 (Tr0711). The resulting assembly revealed a total length of 40 Mb, (Th3844), 39 Mb (Th0179), 36 Mb (Ta0020), and 32 Mb (Tr0711), in which 10,786 (Th3844), 11,322 (Th0179), 10,082 (Ta0020), and 8,796 (Tr0711) genes were predicted. Then, the annotation of the predicted CDS sequences from the evaluated strain genes revealed 413 (Th3844), 413 (Th0179), 377 (Ta0020), and 329 (Tr0711) CAZymes. The orthology analysis revealed 18,349 orthogroups, which encompassed 95% of the total genes, 3,378 orthogroups with all species present, and 408 species-specific orthogroups. A genome-

39 wide phylogenetic analysis modeled from the 1,864 single-copy orthogroups provided details on the  
40 relationship of the newly sequenced species with other *Trichoderma* and with more evolutionarily  
41 distant genera. Structural variants revealed genomic rearrangements between Th3844, Th0179,  
42 Ta0020, and Tr0711 with the *T. reesei* QM6a reference genome as well as the functional effects of  
43 such variants on the evaluated strains. In conclusion, the findings presented herein allow the genetic  
44 diversity of the evaluated strains, including those from the same species, to be viewed, offering  
45 opportunities to further explore such fungal genomes in future biotechnological and industrial  
46 applications.

## 47 1 Introduction

48 Fungi of the genus *Trichoderma* are characterized by their considerable nutritional versatility  
49 (Sharma et al., 2019), which allows them to be employed in a wide range of biotechnological  
50 applications (Kidwai and Nehra, 2017). For example, *Trichoderma reesei* is the primary fungal  
51 source of the industrial cellulases and hemicellulases present in enzymatic cocktails (Bischof et al.,  
52 2016). In addition to enzymatic activities, the capacity of biocontrol against plant pathogenic fungi  
53 has been widely explored in *Trichoderma harzianum* and *Trichoderma atroviride* (Medeiros et al.,  
54 2017; Saravanakumar et al., 2017). Recently, *T. harzianum* strains were explored for their enzymatic  
55 potential and were demonstrated to be useful for improving the lignocellulosic conversion into sugars  
56 during second-generation ethanol (2G ethanol) production (Almeida et al., 2021; Delabona et al.,  
57 2020a; Motta et al., 2021; Zhang et al., 2020a).

58 The phenotypic and ecological heterogeneity across fungi of the same genera is reflected, in part, by  
59 the diversity observed within their genomes (Priest et al., 2020). In this way, the diverse and  
60 important roles of fungi, as well as the technological advances in next-generation sequencing, have  
61 motivated broad efforts to sequence several fungal genomes (Ganesh Kumar et al., 2021; Hagestad et  
62 al., 2021; Nagel et al., 2021; Varga et al., 2019; Wu et al., 2018). Since the genome of *T. reesei*  
63 QM6a was first presented (Martinez et al., 2008), *Trichoderma* sequencing studies have increased  
64 with the goal of better understanding the biological and ecological roles of *Trichoderma* to improve  
65 their applications (Druzhinina et al., 2018b; Horta et al., 2014; Kubicek et al., 2011; Kubicek et al.,  
66 2019; Li et al., 2017; Schmoll et al., 2016). Such a growing number of sequenced species may help  
67 reveal the molecular basis for the specific features of diverse *Trichoderma* strains.

68 Previously, the transcriptional profiles of two *T. harzianum* strains, *T. harzianum* IOC-3844 (Th3844)  
69 and *T. harzianum* CBMAI-0179 (Th0179), were analyzed under cellulose degradation conditions and  
70 compared with those from *T. atroviride* CBMAI-0020 (Ta0020) and *T. reesei* CBMAI-0711 (Tr0711)  
71 (Almeida et al., 2021; Horta et al., 2018). Such studies have suggested the great potential of both *T.*  
72 *harzianum* strains as hydrolytic enzyme producers, and this was similar to Tr0711, while Ta0020  
73 showed a low cellulolytic ability. Furthermore, differences in the transcription regulation within  
74 hydrolytic enzyme expression were observed for Th3844 and Th0179 (Rosolen et al., 2021),  
75 highlighting the genetic differences between such strains. Although previous studies investigated the  
76 Th3844 genomic regions, which are related to biomass degradation, through bacterial artificial  
77 chromosome (BAC) library construction (Crucello et al., 2015; Ferreira Filho et al., 2017), genomic  
78 information regarding the hydrolytic strains of *T. harzianum*, Th3844 and Th0179 remains unclear.

79 In this study, Pacific Biosciences (PacBio) (Ardui et al., 2018) technology was used to obtain highly  
80 contiguous de novo assemblies and to describe the genetic variation present among Th3844 and  
81 Th0179. Aiming to expand knowledge on the genetic diversity within the genus *Trichoderma*, the  
82 results obtained for *T. harzianum* strains were compared to those from *T. atroviride* and *T. reesei*. The

83 chosen species are appropriate for the study's goal because while *T. atroviride* is a biocontrol species  
84 that is distantly related to the lignocellulolytic species *T. reesei* (Druzhinina et al., 2006), representing  
85 a well-defined phylogenetic species (Dodd et al., 2003), *T. harzianum sensu lato* is also commonly  
86 used in biocontrol but constitutes a complex of several cryptic species (Chaverri et al., 2015;  
87 Druzhinina et al., 2010).

88 After performing whole-genome annotation, we investigated the content of carbohydrate-active  
89 enzymes (CAZymes) (Cantarel et al., 2009) that were distributed among the studied genomes. To  
90 thoroughly investigate the genetic variability across the four evaluated strains, we explored the  
91 structural variants (SVs), which represent a major form of genetic and phenotypic variations that are  
92 inherited and polymorphic in species (Mills et al., 2011), between them and *T. reesei* QM6a, the  
93 reference genome (Martinez et al., 2008). In addition, by performing a comparative genomic analysis  
94 across the genus *Trichoderma* and more evolutionarily distant genera, the orthologs and the  
95 orthogroups across them were identified, and the rooted gene tree based on the single-copy orthologs  
96 was inferred.

97 The genomic resources we provide herein significantly extend our knowledge regarding the evolution  
98 and basic biology of the evaluated strains, and this may increase their biotechnological employment.  
99 The results from this study might also increase the availability of genomic data, which can be used to  
100 perform comparative studies to correlate phenotypic differences in the genetic diversity of  
101 *Trichoderma* species; therefore, the study may help to improve the search for enzymes with enhanced  
102 properties and provide aid toward improving the production of chemicals and enzymes in such fungi.

## 103 **2 Material and methods**

### 104 **2.1 Fungal strains and culture conditions**

105 The species originated from the Brazilian Collection of Environment and Industry Microorganisms  
106 (CBMAI), which is located in the Chemical, Biological, and Agricultural Pluridisciplinary Research  
107 Center (CPQBA) at the University of Campinas (UNICAMP), Brazil. The identity of *Trichoderma*  
108 isolates was authenticated by CBMAI based on phylogenetic studies of their internal transcribed  
109 spacer (ITS) region and translational elongation factor 1 (*tef1*) marker gene. Briefly, Th3844,  
110 Th0179, Ta0020, and Tr0711 strains were cultivated on potato dextrose agar (PDA) solid medium  
111 (ampicillin 100 µg/ml and chloramphenicol 34 µg/ml) for 3 days at 28 °C. Conidia were harvested,  
112 and an initial spore solution was used to inoculate 500 mL of potato dextrose broth (PDB) medium.  
113 The cultivation process was performed in biological triplicates for 72 h at 28 °C and 200 rpm for all  
114 evaluated strains. Then, mycelial samples were harvested using Miracloth (Millipore), frozen using  
115 liquid nitrogen, and stored at -80 °C. Frozen material was used for DNA extraction.

### 116 **2.2 DNA extraction and sequencing**

117 The ground fungal tissue was suspended using lysis buffer, then phenol:chloroform:isoamyl alcohol  
118 (25:24:1) (Sigma, US) was added. After centrifugation at 4 °C and 13,000 rpm for 10 min, the  
119 aqueous layer was collected, and genomic DNA was precipitated via the addition of isopropanol.  
120 DNA was harvested by centrifugation at 4 °C and 13,000 rpm for 10 min, and the pellet was washed  
121 with 70% ethanol, followed by centrifugation at 4 °C and 13,000 rpm for 5 min. After a second  
122 washing with 95% ethanol and centrifugation at 4 °C and 13,000 rpm for 5 min, the pellet was dried  
123 at room temperature and dissolved in TE buffer. Before the quality control steps, the DNA was  
124 subjected to RNase treatment.

125 The quantity of the extracted gDNA was determined by measuring the absorbance at 260 nm using a  
126 NanoDrop 1000 spectrophotometer (Thermo Fisher Scientific) and Qubit Fluorometer (Thermo  
127 Fisher Scientific). The quality of extracted gDNA was assessed through 0.8% agarose gel  
128 electrophoresis. HiFi sequencing libraries were prepared according to the PacBio protocol, and  
129 sequencing was performed at the Arizona Genomics Institute (AGI; Tucson, USA) using a SMRT  
130 DNA sequencing system from PacBio (PacBio RSII platform).

### 131 **2.3 Genome assembly**

132 The data were transferred to a local server, and the genomes were assembled de novo using Canu  
133 software (v.2.1) (-pacbio – hifi, and a genome estimate equal to 40 Mb for all evaluated strains),  
134 which was developed for long-read sequencing (Koren et al., 2017). Genome integrity was assessed  
135 using the Quality Assessment Tool (QUAST) (Gurevich et al., 2013) (v.5.0.2) and Benchmarking  
136 Universal Single-Copy Orthologs (BUSCO) (Simão et al., 2015) (v.4.1.4) tools. The Nucmer  
137 alignment tool from the MUMmer (v.4.0.0beta2) toolbox (Kurtz et al., 2004; Marçais et al., 2018)  
138 was used to perform the whole-genome alignments between the evaluated strains.

### 139 **2.4 Gene prediction and functional annotation**

140 Gene prediction was performed using AUGUSTUS (v.3.3.3) (Stanke et al., 2006) through gene  
141 models, which were built from *T. harzianum* T6776, *T. atroviride* IMI206040, and *T. reesei* QM6a  
142 (TrainAugustus (v.3.3.3)), together with the MAKER (Cantarel et al., 2008) (v.2.31.11). Such  
143 programs are implemented on the Galaxy platform. The predicted genes were functionally annotated  
144 by searching for homologous sequences in the UniProt (The UniProt, 2021), eggNOG-mapper v.2  
145 (Cantalapiedra et al., 2021), and Protein Annotation with Z score (PANNZER2) (Törönen et al.,  
146 2018) databases. Transmembrane proteins were predicted using TMHMM v.2.0 (Krogh et al., 2001).  
147 For the annotation of CAZymes, we used CDS sequences as homology search queries against the  
148 database of the dbCAN2 server (Zhang et al., 2018), which integrates (I) DIAMOND (E-Value < 1e-  
149 102) (Buchfink et al., 2015), (II) HMMER (E-Value < 1e-15, coverage > 0.35) (Finn et al., 2011),  
150 and Hotpep (Frequency > 2.6, Hits > 6) (Busk et al., 2017) tools. We considered all CDSs as true hits  
151 if they were predicted by at least two tools. Coverages were estimated with QualiMap  
152 (Okonechnikov et al., 2016) (v.2.2.2c) using minimap2 (Li, 2018) v. 2.17 + galaxy4, which were  
153 both implemented on the Galaxy platform (Afgan et al., 2018).

### 154 **2.5 Ortholog identification and clustering**

155 The proteomes of Th3844, Th0179, Ta0020, and Tr0711 were compared with the *Trichoderma* spp.  
156 proteomes that are available on NCBI databases. *Fusarium* spp., *Aspergillus* spp., and *Neurospora*  
157 spp. were used as outgroup. For this analysis, we used the software OrthoFinder (Emms and Kelly,  
158 2015, 2019) v2.5.2, which clustered the protein sequences of fungi into orthologous groups and  
159 allowed the phylogenetic relationships between them to be identified. The consensus species tree was  
160 inferred using STAG algorithm (Emms and Kelly, 2018) and rooted using STRIDE algorithm (Emms  
161 and Kelly, 2017), which are implemented on the OrthoFinder program. The resulting tree from the  
162 OrthoFinder analysis was visualized and edited using Interactive Tree of Life (iTOL) v6 (Letunic and  
163 Bork, 2007).

### 164 **2.6 Long-read structural variant analysis**

165 SVs were identified by aligning the PacBio HiFi reads from Th3844, Th0179, Ta0020, and Tr0711  
166 with the *T. reesei* QM6a reference genome (Martinez et al., 2008) using the software Map with

167 BWA-MEM (Li and Durbin, 2010) v.0.7.17.2 with (-x pacbio, sort by chromosomal coordinates).  
168 The duplicate reads in the BAM file were identified and marked using the tool MarkDuplicates  
169 (Institute) v.2.18.2.2. Variants were called using Sniffles (Sedlazeck et al., 2018) v.1.0.12+galaxy0  
170 allowing for a minimum support of 10 (--min\_support), maximum number of splits of 7 (--  
171 max\_num\_splits), maximum distance of 1000 (--max\_distance), minimum length of 30 (--  
172 min\_length), minimum mapping quality of 20 (--minmapping\_qual), and CCS reads option (--  
173 ccs\_reads). SVs were annotated using SnpEff (v.4.3+T. galaxy1) (Cingolani et al., 2012), which  
174 allowed the effects of variants in genome sequences to be categorized. Such tools are implemented  
175 on the Galaxy platform (Afgan et al., 2018).

## 176 **3 Results**

### 177 **3.1 Strain cultivations and evaluation of extracted DNA**

178 First, we cultivated Th3844, Th0179, Ta0020, and Tr0711, which can be identified by common  
179 morphological characteristics, such as a bright green conidial pigment and a repetitive branch (Figure  
180 1). Next, the DNA from the evaluated *Trichoderma* isolates was extracted, and its integrity and  
181 quality were assessed (Supplementary Material 1: Supplementary Table 1 and Supplementary  
182 Material 1: Supplementary Figure 1).

### 183 **3.2 Assembled genomic features and general comparison across *Trichoderma* spp.**

184 In the present study, we introduced the whole-genome sequences of Th3844, Th0179, Ta0020, and  
185 Tr0711 (Table 1). Overall, the genomes of the evaluated *Trichoderma* spp. varied in a number of  
186 contigs (14–26), sizes (32–40 Mb) and gene contents (8,796–11,322 genes). In comparison with the  
187 other strains, Th0711 contains the smallest gene repertoire, while Th3844 contains the highest gene  
188 repertoire. To assess the completeness and integrity of the assembled genomes, BUSCO analysis was  
189 performed. For all evaluated strains, over 90% of genes were complete. Although the genome of  
190 Th3844 presented a considerable number of missing genes (9.7%), its assembled genome exhibited a  
191 lower degree of fragmentation compared to that of other genomes.

192 Considering the genome sequencing coverage, genome size, GC content, length metrics (N50 and  
193 L50 values), assembly level, and number of genes, the genomes of Th3844, Th0179, Ta0020, and  
194 Tr0711 were compared to other fungal genome references (Baroncelli et al., 2015; Chung et al.,  
195 2021; Kubicek et al., 2011; Li et al., 2017; Martinez et al., 2008) (Table 2). All *T. harzianum*  
196 genomes were similar in size and GC content. The same profile was observed for the *T. atroviride*  
197 and *T. reesei* genomes. Large differences were found for the genome sequencing coverage, in which  
198 Th3844, Th0179, Ta0020, and Tr0711 presented higher values than those reported for other strains in  
199 the literature (Baroncelli et al.; Kubicek et al., 2011; Li et al., 2017). In regard to quality, except for  
200 Tr0711, the genomes assembled in this study showed a lower degree of fragmentation compared to  
201 those previously available (Baroncelli et al., 2015; Chung et al., 2021; Kubicek et al., 2011; Li et al.,  
202 2017; Martinez et al., 2008).

203 We also performed alignment analyses to evaluate the similarities and variations between the genomes  
204 of the studied strains (I) with *T. reesei* QM6a, which is a model organism for the lignocellulose  
205 deconstruction system and has a genome that is assembled at the chromosomal level (Li et al., 2017)  
206 (Figure 2), and (II) with their respective reference genomes (Supplementary Material 1: Supplementary  
207 Figure 2). The profile of alignment across the genomes illustrated the degree of divergence across the  
208 studied strains with *T. reesei* QM6a and with the closest related strain of each evaluated fungus. For  
209 each evaluated strain, we observed alignment in different regions of the *T. reesei* QM6a reference

210 genome. Using *T. reesei* QM6a as a reference genome, we found a total of (I) 12% aligned bases for  
211 Th3844, (II) 13% aligned bases for Th0179, (III) 8% aligned bases for Ta0020, and (IV) 95% aligned  
212 bases for Tr0711. The total percentage of aligned bases for Th3844 and Th0179 genomes with the *T.*  
213 *harzianum* T6776 genome was approximately 83.5% and 89%, respectively. In addition, for the  
214 Ta0020 genome, the total percentage of aligned bases to the *T. atroviride* IMI206040 reference genome  
215 was approximately 88%.

### 216 3.3 Genome functional annotation and CAZyme distribution

217 After performing the genome assembly and gene prediction steps, functional annotation was  
218 accomplished by a homology search. The functional category distribution regarding the clusters of  
219 orthologous groups of proteins (COG) (Tatusov et al., 2000) is shown in Figure 3 and Supplementary  
220 Material 1: Supplementary Table 2. Disregarding the (S) function unknown category, the top 5  
221 functional categories were (G) carbohydrate metabolism and transport, (O) posttranslational  
222 modification, protein turnover, chaperone functions, (Q) secondary structure, (E) amino acid  
223 transport and metabolism, and (U) intracellular trafficking, secretion, and vesicular transport.  
224 Overall, the evaluated strains seem to have similar COG assignment profiles. The complete  
225 functional annotation of the four genomes is available in Supplementary Material 2: Supplementary  
226 Table 3.

227 Within filamentous fungi, the genus *Trichoderma* is a model system for the production of CAZymes,  
228 which includes glycoside hydrolases (GHs), carbohydrate esterases (CEs), glycosyltransferases  
229 (GTs), polysaccharide lyases (PLs), auxiliary activities (AAs), and carbohydrate-binding modules  
230 (CBMs) (Cantarel et al., 2009). Due to the important role of CAZymes in microparasitism and  
231 saprophytic degradation of debris, a thorough investigation regarding the enzyme content in the  
232 genomes of the four *Trichoderma* spp. was performed (Supplementary Material 3: Supplementary  
233 Table 4). Overall, the genes encoding the CAZymes encompassed approximately 3.8% of the  
234 genomes assembled herein. Moreover, to detect similarities and differences between the strains, their  
235 CAZyme profiles were compared (Figure 4A).

236 Among the main CAZyme classes detected in all strains, GHs were overrepresented, and Th3844  
237 (256) and Th0179 (252) had the highest number, followed by Ta0020 (230) and Tr0711 (184). This  
238 CAZyme class was followed by GTs as follows: (I) 88 (Th3844), (II) 90 (Th0179), (III) 90 (Ta0020),  
239 and (IV) 86 (Tr0711). However, when the CAZymes with predicted signal peptides were analyzed,  
240 we observed that only a few GTs were secreted, as follows: (I) 8 (Th3844), (II) 9 (Th0179), (III) 7  
241 (Ta0020), and (IV) 4 (Tr0711) (Figure 4B). The distribution of the different CAZyme families  
242 among strains was investigated and is available in Supplementary Material 1: Supplementary Figure  
243 3. For simplification purposes, only the CAZyme families related to biomass degradation are  
244 exhibited in Figure 5. Overall, CAZymes from the GH5, AA1, AA3, GH2, and GH3 families were  
245 well represented for all strains, and the highest numbers were in Th3844 and Th0179.

246 Due to the mycoparasitic characteristics of some fungi from the genus *Trichoderma*, CAZymes  
247 involved in such activity were also identified in the four evaluated genomes (Supplementary Material  
248 1: Supplementary Figure 3). For example, CAZymes from the GH18 family, which are related to  
249 chitin degradation, were present in all evaluated strains, and CAZymes from GH75 are related to  
250 chitosan degradation. Additionally, we would like to highlight that other CAZyme classes, including  
251 GH16, GH55, and GH64, are related to the mycoparasitic interaction that was present in the genomes  
252 of Th3844, Th0179, Ta0020, and Tr0711.

### 253 3.4 Orthology analysis, phylogenetic profiling, and structural variant analyses

254 The predicted proteomes of Th3844, Th0179, Ta0020, and Tr0711 were compared with those of 19  
255 other *Trichoderma* spp. and with those from more phylogenetically distant fungi, including *Fusarium*  
256 spp., *Aspergillus* spp., and *Neurospora* spp. (outgroups) (Supplementary Material 4: Supplementary  
257 Table 5). We identified a total of 18,349 orthogroups, which encompassed 313,444 genes (95%) in a  
258 total of 329,927 genes, i.e., the number of unassigned genes was equal to 16,483 (5%) genes.  
259 Moreover, we detected 3,378 orthogroups with all species present, of which 1,864 consisted entirely  
260 of single-copy genes and 408 species-specific orthogroups. Fifty percent of all genes were in  
261 orthogroups with 29 or more genes (G50 was 29) and were contained in the largest 4,609  
262 orthogroups (O50 was 4609). Regarding the orthologous relationships across the evaluated strains,  
263 both *T. harzianum* strains shared the highest number of orthologous genes among them compared to  
264 that of the other strains. In relation to the other evaluated strains, Th3844 and Th0179 presented more  
265 orthologs that were in common with Ta0020 than with Tr0711 (Table 3). To explore the evolutionary  
266 history of Th3844, Th0179, Ta0020, and Tr0711, a rooted species tree was inferred using the 1,864  
267 single-copy orthologous genes that were conserved in the 29 fungi analyzed (Figure 6 and  
268 Supplementary Material 1: Supplementary Figure 4). Such phylogenetic analysis indicated that  
269 Tr0711 was most closely related to *Trichoderma parareesei* CBS 125925, while Ta0020 was most  
270 closely related to *T. atroviride* IMI206040. On the other hand, Th0179 and Th3844 were  
271 phylogenetically close to *Trichoderma lentiforme* CFAM-422 and to other *T. harzianum* strains  
272 (TR274 and CB226.95), respectively.

273 The SVs of the evaluated *Trichoderma* isolates were identified by mapping the long reads of the  
274 fungi against the reference genome of *T. reesei* QM6a (Martinez et al., 2008). A total of 12,407  
275 (Th3844), 12,763 (Th0179), 11,650 (Ta0020), and 7,103 (Tr0711) SVs were identified for each  
276 strain, showing substitution rates of  $\sim 1/2,674$  nucleotides (Th3844),  $\sim 1/2,585$  nucleotides (Th0179),  
277  $\sim 1/2,832$  nucleotides (Ta0020), and  $\sim 1/4,655$  nucleotides (Tr0711). These SVs included different  
278 phenomena that affect gene sequences, such as break ends, deletions, multiple nucleotides and  
279 InDels, duplications, insertions, and inversions (Supplementary Material 5: Supplementary Table 6  
280 and Figure 7A). Compared with the other evaluated strains, Tr0711 presented a low number of SVs,  
281 while Th0179 displayed the highest number. For all evaluated strains, the most presented SV  
282 categories were multiple nucleotides and an InDel, followed by deletions and insertions (Figure 7A).  
283 To thoroughly investigate the functional effects of the identified SVs, we performed an annotation of  
284 the structural rearrangements, which were placed into different classes based on their predicted  
285 effects on protein function. Details of these effects can be found in Supplementary Material 6:  
286 Supplementary Table 7, and the most prevalent effects are represented in Figure 7B. For all evaluated  
287 strains, the majority of variants presented a modifier impact, which was higher at downstream and  
288 upstream genomic locations. Such an effect was more accentuated for both *T. harzianum* strains. In  
289 addition, SVs present in transcripts, genes, and intergenic regions were well represented for Ta0020.

## 290 4 Discussion

291 Diversity within the genus *Trichoderma* is evident from the wide range of phenotypes exhibited by  
292 the fungi as well as the various ecological roles and industrial purposes the fungi serve (Nakkeeran et  
293 al., 2021). Because of their various applications, different *Trichoderma* species have become model  
294 organisms for a broad spectrum of physiological phenomena, such as plant cell wall degradation and  
295 enzyme production (Fang et al., 2021), biocontrol (Zin and Badaluddin, 2020), and response to light  
296 (Schmoll, 2018). Within the genus *Trichoderma*, *T. harzianum* has been used as a commercial  
297 biocontrol agent against plant diseases (Fraceto et al., 2018). In addition to their mycoparasitic  
298 activities, hydrolytic enzymes from *T. harzianum* strains have demonstrated great potential in the  
299 conversion of lignocellulosic biomass into fermentable sugars (Almeida et al., 2021; Delabona et al.,

2020b; Motta et al., 2021; Zhang et al., 2020b). Recently, different types of enzymatic profiles across *Trichoderma* species were reported, in which Th3844 and Th0179 presented a higher hydrolytic potential during growth on cellulose than that of Ta0020 (Almeida et al., 2021); furthermore, differences between Th3844 and Th0179 concerning the transcriptional regulation coordinated by XYR1 and CRE1 during cellulose degradation were reported (Rosolen et al., 2021). Because such diversity in enzyme response might be related to transcriptomic and genomic differences, we aimed to provide foundations for further studies that could investigate such variations at a genomic level.

Technological advances, particularly in long-read sequencing, coupled with the increasing efficiency and decreasing costs across sequencing platforms, enabled fungal genomes to be characterized (Dal Molin et al., 2018; Miyauchi et al., 2020; Wu et al., 2020). Herein, we presented high-quality genome assemblies for two *T. harzianum* strains with hydrolytic potential (Th3844 and Th0179) and, for comparative purposes, for a mycoparasitic species (Ta0020) and saprotrophic species (Tr0711). Thus, *T. reesei* and *T. atroviride* strains were used to assess the genetic differences in the genus *Trichoderma*. With the aim of obtaining high-quality genomes, we employed Canu software for the genome assemblies, and this software has been applied with success in the assembly of fungal genomes (Courtine et al., 2020; Gan et al., 2020; Montoliu-Nerin et al., 2020). Except for Tr0711, the resulting genomics assemblies displayed the highest coverage scores and the lowest fragmentation values compared to those of *Trichoderma virens* Gv29-8 (Kubicek et al., 2011) as well as to *T. harzianum* T6776 (Baroncelli et al., 2015) and *T. atroviride* IMI206040 (Kubicek et al., 2011), which were used as the reference genome in preceding studies from our research group (Almeida et al., 2021; Horta et al., 2018). Although the genomes were not assembled at the chromosome level, the quality of the Th3844, Th0179, Ta0020, and Tr0711 genome assemblies based on the BUSCO value was over 90%. Only the Th3844 genome exhibited 9.7% missing genes. However, even chromosome-level genome assembly does not necessarily achieve a complete BUSCO score (Chung et al., 2021). This may be because the assembly is not 100% accurate, but at the same time, the BUSCO value may not be a perfect indicator to assess genomic qualities. Despite its limitations, without a definitive alternative, BUSCO is still an essential genomic quality assessment tool that includes up-to-date data from many species.

After evaluating the quality of the four assembled genomes, we performed a gene prediction and functional annotation for the datasets. The ecological behavior of the mycoparasites *T. atroviride* and *T. virens*, compared to the plant wall degrader *T. reesei*, is reflected by the sizes of the respective genomes; *T. atroviride* (36 Mb) and *T. virens* (39 Mb) were somewhat larger than the weakly mycoparasitic *T. reesei* (33 Mb) (Kubicek et al., 2011; Martinez et al., 2008). Herein, compared to Th3844 (40 Mb), Th0179 (39 Mb), and Ta0020 (36 Mb), the genome of Tr0711 (32 Mb) was smaller, which might be conceivably as the gene function is lost to mycoparasitism during the evolution of *T. reesei* (Kubicek et al., 2011). In relation to the number of genes, our results showed that Tr0711 presented a smaller gene content than that of Th3844, Th0179, and Ta0020. Such findings corroborated a previous study (Xie et al., 2014), in which 9,143 and 11,865 genes were predicted for *T. reesei* and *T. atroviride*, respectively. In relation to the *T. reesei* QM6a reference genome, the genomes of Th3844, Th0179, Ta0020, and Tr0711 displayed significant structural reorganization, which was more greatly accentuated by an increased phylogenetic distance. Interestingly, this structural reorganization was also observed within strains of the same species, highlighting their genetic diversity.

#### 4.1 Comparative and functional genomics



344 To obtain insights regarding the functional profile of Th3844, Th0179, Ta0020, and Tr0711, COG  
345 analyses of proteins from their genomes were performed. “Carbohydrate metabolism and transport”  
346 was a notable COG term for all evaluated strains, suggesting that the genomic arsenal of these fungi  
347 is connected to their ability of using carbon sources that are available in the environment. Such  
348 characteristics are well known for saprophytic fungal *T. reesei* (Arntzen et al., 2020), and recent  
349 studies have observed the same characteristics for *T. harzianum* (Almeida et al., 2021; Delabona et  
350 al., 2020a). “Posttranslational modification, protein turnover, chaperone functions” was the second  
351 most notable COG term that was present in the four evaluated genomes. Posttranslational  
352 modifications (PTMs), which are used by eukaryotic cells to diversify their protein functions and  
353 dynamically coordinate their signaling networks, encompass several specific chemical changes that  
354 occur on proteins following their synthesis (Ramazi and Zahiri, 2021). The production of intact and  
355 functional proteins is a prerequisite for large-scale protein production, and extensive host-specific  
356 PTMs often affect the catalytic properties and stability of recombinant enzymes. The high  
357 extracellular secretion capability and eukaryotic PTM machinery make *Trichoderma* spp. particularly  
358 interesting hosts (Wei et al., 2021). In this context, PTMs are a major factor in the cellulolytic  
359 performance of fungal cellulases (Amore et al., 2017; Beckham et al., 2012; Dana et al., 2014), and  
360 the impact of plant PTMs on the enzyme performance and stability of the major cellobiohydrolase  
361 Cel7A from *T. reesei* has already been determined (van Eerde et al., 2020). In addition, PTMs,  
362 especially phosphorylation, of the proteins involved in plant biomass degradation, including CRE1,  
363 play an essential role in signal transduction to achieve carbon catabolite repression (CCR) (Han et al.,  
364 2020; Horta et al., 2019). Thus, describing this class of *Trichoderma* genomes is essential to  
365 understand the impact of alternative PTMs on the catalytic performance and stability of recombinant  
366 enzymes. We also would like to highlight that the “secondary structure” and “amino acid transport  
367 and metabolism”, which are related to PTMs, were overrepresented COG terms.

368 To achieve the complete depolymerization of complex lignocellulosic polysaccharides, a repertoire  
369 of enzymes that act together on different chemical bonds is needed (Chukwuma et al., 2020). The  
370 comparative genomics of *Trichoderma* spp. suggested that mycoparasitic strains, such as *T. vires* and  
371 *T. atroviride*, presented a set of genes, including CAZymes and genes encoding secondary  
372 metabolites, that were more expressive and related to mycoparasitism compared to those of the  
373 saprotrophic species *T. reesei* (Kubicek et al., 2011). Although such fungi are widely used in industry  
374 as a source of cellulases and hemicellulases, they have a smaller arsenal of genes that encode the  
375 CAZymes related to biomass deconstruction than that of other lignocellulolytic fungi (Martinez et al.,  
376 2008). A potential reason for this observation is that its CAZyme content was shaped by loss and a  
377 massive horizontal gene transfer (HGT) was gained in enzymes that degrade plant cell walls  
378 (Druzhinina et al., 2018a). Herein, compared to the other evaluated strains, Tr0711 also displayed a  
379 lower quantity of genes that encode CAZymes. Although the genome of the evaluated strains  
380 presented a significant number of GTs, only a few were predicted to be secreted proteins. Such a  
381 result could be related to the enzyme activity exhibited by the CAZymes from the GT class, which  
382 includes enzymes that are involved in cell wall synthesis in microorganisms and not necessarily in  
383 lignocellulose deconstruction (Ardèvol and Rovira, 2015). Furthermore, the presence of putative  
384 CAZyme-encoding genes in the genomes of Th0179 and Th3844 provides insight into its  
385 lignocellulose-degrading enzyme potential but cannot be directly related to its real degradation  
386 ability. In fact, since fungal species rely on different strategies, it has been observed that the number  
387 of genes related to the degradation of a given polysaccharide is not necessarily correlated to the  
388 extent of its degradation (Arntzen et al., 2020; Kjærboelling et al., 2020). For instance, *T. reesei* relies  
389 on the high production levels of a limited set of glycosyl hydrolases (Arntzen et al., 2020). For this  
390 reason, CAZy analysis is associated with functional approaches, such as enzymatic activity assays,  
391 which provide valuable insight into the actual behavior of the concerned species on specific

392 lignocellulose substrates. Regarding the CAZyme content, the results found here for the Th3844,  
393 Th0179, Ta0020, and Tr0711 genomes follow the same profile as that of a previous study (Fanelli et  
394 al., 2018), in which the CAZyme genetic endowment of some strains from *T. harzianum*, including  
395 B97 and T6776, was significantly higher than that of *T. atroviride* IMI206040, *T. reesei* QM6a, and  
396 *T. virens* Gv-29-8.

397 In relation to the CAZyme families that are directly associated to the deconstruction of plant biomass,  
398 the genomes of Th3844, Th0179, Ta0020, and Tr0711 showed an expressive number of genes  
399 encoding GH5, which includes cellulases that are most abundant in fungi (Li and Walton, 2017) and  
400 are commonly present in industrial enzymatic cocktails; GH3, which includes  $\beta$ -glucosidases that are  
401 frequently secreted into the medium (Guo et al., 2016); and AA3, which is a member of the enzyme  
402 arsenal that is auxiliary to GHs (Levasseur et al., 2013). Lytic polysaccharide monooxygenases  
403 (LPMOs), which are classified into CAZy auxiliary activity families AA9-AA11 and AA13-AA16,  
404 are copper-dependent enzymes that also perform important roles in lignocellulose degradation  
405 (Couturier et al., 2018; Monclaro and Filho, 2017). As AA9, AA11, AA13, AA14, and AA16 are  
406 exclusive to fungal genomes, multiple genes encoding LPMOs appear to be common in fungal  
407 genomes, particularly in Ascomycetes and Basidiomycetes (Kracher et al., 2016). Herein, each of the  
408 Th3844, Th0179, Ta0020, and Tr0711 genomes exhibited three AA9 and two AA14 enzymes.  
409 Compared to other fungi, the genomes of *Trichoderma* species harbor a high number of chitinolytic  
410 genes (Kubicek et al., 2011; Kubicek et al., 2019), reflecting the importance of these enzymes in the  
411 mycoparasitic characteristic of fungi. From the *Trichoderma* genomes that were analyzed in detail  
412 thus far, the fungal chitinases that belong to the family GH 18 are significantly expanded in *T. virens*,  
413 *T. atroviride*, *T. harzianum*, *Trichoderma asperellum*, *Trichoderma gamsii*, and *Trichoderma*  
414 *atrobrunneum* (Fanelli et al., 2018; Kubicek et al., 2011). Similarly, the number of chitosanases  
415 (GH75) is enhanced and there are at least five corresponding genes; in contrast, most other fungi  
416 have only one or two corresponding genes (Kappel et al., 2020; Kubicek et al., 2011). Furthermore,  
417  $\beta$ -1,3-glucanases that belong to GH families 16, 17, 55, 64, and 81 are expanded in *Trichoderma*  
418 mycoparasites compared to other fungi (Fanelli et al., 2018; Kubicek et al., 2011). Here, the  
419 CAZyme families that are related to mycoparasitic activity were present in the four genomes studied,  
420 and the most were in Th3844 and Th0179.

## 421 4.2 Insights into the evolutionary history

422 Comparative genomics could be a powerful tool for studying fungal evolution and promoting insights  
423 into their genetic diversity. In this context, identifying orthology relationships among sequences is an  
424 essential step to more thoroughly understand the genetic correlation of particular fungi. Thus, by  
425 applying orthology analyses, we could identify orthogroups and orthologs between the evaluated  
426 strains, as well as among some other *Trichoderma* spp. and filamentous fungi that are more  
427 genetically distant. In the genus *Trichoderma*, several lifestyles have been documented, including  
428 saprotrophy, which is a lifestyle that is also observed in other filamentous fungi, such as *Neurospora*  
429 spp., *Aspergillus* spp., and *Fusarium* spp. (Arntzen et al., 2020; Corrêa et al., 2020; Najjarzadeh et  
430 al., 2021). Thus, the proteomes of some species and strains of such genera were also included in the  
431 orthology analysis. Through our results, we may infer that some genus-specific genes are necessary  
432 for specific lifestyles and are shared by fungi that have the same lifestyle but are in quite different  
433 evolutionary orders. The phylogenetic tree modeled from the orthologous analysis revealed a low  
434 bootstrap value for the clade formed by aligning the sequence proteomes from *T. harzianum*.  
435 Furthermore, the presence of other *Trichoderma* species, such as *T. lentiforme*, *T. guizhouense*, and  
436 *T. simmonsii*, was observed. These observations might be explained by the complex speciation  
437 process within the *T. harzianum* species group (Druzhinina et al., 2010); therefore, the phylogenetic

438 position is uncertain for fungi from these species. However, the molecular identification of Th3844  
439 and Th0179 based on the ITS and *tef1* sequences has already been reported (Rosolen et al., 2021),  
440 confirming that both strains were phylogenetically close to other *T. harzianum* strains. Tr0711 was  
441 grouped with *T. pararessei* CBS 125925, and both were phylogenetically in proximity to other *T.*  
442 *reesei* strains.

443 While short reads perform well in the identification of single nucleotide variants (SNVs) and small  
444 insertions and deletions (InDels), they are not well suited for detecting changes in larger sequences  
445 (Mahmoud et al., 2019). SVs, which include insertions, deletions, duplications, inversions, or  
446 translocations that affect  $\geq 50$  bp (Mills et al., 2011), are more amenable to long-read sequencing  
447 (Mitsuhashi and Matsumoto, 2020; Sakamoto et al., 2020). In fungi, SV analysis was employed  
448 successfully using reads from third-generation sequencing (Badet et al., 2021; Basile et al., 2021). In  
449 this study, we detected SVs by aligning our four genomes against *T. reesei* QM6a (Martinez et al.,  
450 2008); although the genomes were assembled at a scaffolding level, unlike the *T. reesei* QM6a  
451 reference genome that was assembled at the chromosome level, we chose to proceed with this dataset  
452 because its annotation file was available (Li et al., 2017). As expected, due to phylogenetic proximity  
453 to the reference genome (Rosolen et al., 2021), Tr0711 showed the lowest number of SVs compared  
454 to that of the other strains. However, although *T. atroviride* is phylogenetically distant from *T. reesei*  
455 (Rosolen et al., 2021), Ta0020 exhibited fewer SVs than that of both *T. harzianum* strains, and this  
456 result might be explained by the uncertain phylogenetic position of fungi in these species (Druzhinina  
457 et al., 2010). Although the *T. harzianum* strains are phylogenetically close (Rosolen et al., 2021),  
458 genetic variability across the strains is evident when comparing the SVs that were identified from  
459 mapping both genomes against *T. reesei* QM6a (Martinez et al., 2008). Such results are consistent  
460 with the findings of previous studies in that genetic variations between fungal strains of the same  
461 species are not uncommon (Andersen et al., 2011; de Vries et al., 2017; Thanh et al., 2019).

462 Considering their basic and economic importance, the high-quality genomes found herein might be  
463 helpful for better understanding the diversity within the genus *Trichoderma*, as well as improving the  
464 biotechnological applications of such fungi. Furthermore, the comparative study of multiple related  
465 genomes might be helpful for understanding the evolution of genes that are related to economically  
466 important enzymes and for clarifying the evolutionary relationships related to protein function.

#### 467 **Conflicts of interest**

468 *The authors declare that the research was conducted in the absence of any commercial or financial*  
469 *relationships that could be construed as potential conflicts of interest.*

#### 470 **Author contributions**

471 **RRR:** Writing – original draft, methodology, formal analysis, and visualization. **MACH:**  
472 Conceptualization, methodology, and writing – review & editing. **PHCA:** Methodology and  
473 resources. **CCS:** Methodology and formal analysis. **DAS:** Methodology and resources. **GHG:**  
474 Writing - review & editing. **APS:** Conceptualization, supervision, review & editing, and funding  
475 acquisition.

#### 476 **Funding**

477 Financial support for this work was provided by the São Paulo Research Foundation (FAPESP -  
478 Process number 2015/09202-0 and 2018/19660-4), the Coordination of Improvement of Higher  
479 Education Personnel (CAPES, Computational Biology Program - Process number

480 88882.160095/2013-01), and the Brazilian National Council for Technological and Scientific  
481 Development (CNPq- Process number 312777/2018-3). RRR received a PhD fellowship from  
482 CAPES (88887.482201/2020-00) and FAPESP (2020/13420-1), PHCA received a PhD fellowship  
483 from CAPES (88887.612254/2021-00), MACH received a postdoctoral fellowship from FAPESP  
484 (2020/10536-9), and APS received a research fellowship from CNPq (312777/2018-3).

## 485 **Abbreviations**

486 **2G ethanol:** second-generation ethanol  
487 **BAC:** bacterial artificial chromosome  
488 **BUSCO:** benchmarking universal single-copy orthologs  
489 **CAZymes:** carbohydrate-active enzymes  
490 **CBMs:** carbohydrate-binding modules  
491 **CBMAI:** Brazilian collection of environmental and industrial microorganisms  
492 **CCR:** carbon catabolite repression  
493 **CEs:** carbohydrate esterases  
494 **COG:** clusters of orthologous groups of proteins  
495 **CPQBA:** chemical, biological, and agricultural pluridisciplinary research center  
496 **GHS:** glycoside hydrolases  
497 **GTs:** glycosyltransferases  
498 **HGT:** horizontal gene transfer  
499 **InDels:** small insertion and deletions  
500 **iTOL:** interactive tree of life  
501 **ITS:** internal transcribed spacer  
502 **LPMOs:** lytic polysaccharide mono-oxygenases  
503 **PacBio:** pacific biosciences  
504 **PANNZER2:** protein annotation with z score  
505 **PDA:** potato dextrose agar  
506 **PDB:** potato dextrose broth  
507 **PLs:** polysaccharide lyases  
508 **PTMs:** posttranslational modifications  
509 **QUAST:** quality assessment tool  
510 **SNVs:** single nucleotide variants  
511 **SVs:** structural variants  
512 **Ta0020:** *Trichoderma atroviride* CBMAI-0020  
513 **tef1:** translational elongation factor 1  
514 **Th0179:** *Trichoderma harzianum* CBMAI-0179  
515 **Th3844:** *Trichoderma harzianum* IOC-3844

## 516 **Acknowledgments**

517 We are grateful to CBMAI Campinas and SP for conceiving the fungal isolates used in the current  
518 study; the Center of Molecular Biology and Genetic Engineering (CBMEG) at the University of  
519 Campinas and SP for the use of the center and laboratory space; and the São Paulo Research  
520 Foundation (FAPESP), the Coordination of Improvement of Higher Education Personnel (CAPES,  
521 Computational Biology Program), and the Brazilian National Council for Technological and  
522 Scientific Development (CNPq) for supporting the project and researchers.

## 523 **Data availability statement**

524 All data generated or analyzed in this study are included in this published article (and its  
525 supplementary information files). The raw datasets and the assembled genomes were deposited in the  
526 NCBI Sequence Read Archive and can be accessed under BioProject number PRJNA781962 and  
527 BioSample number, as follow SAMN23309297 (Th3844), SAMN23309298 (Th0179),  
528 SAMN23309299 (Ta0020), and SAMN23309300 (Tr0711).

## 529 **References**

- 530 Afgan, E., Baker, D., Batut, B., van den Beek, M., Bouvier, D., Čech, M., Chilton, J., Clements, D.,  
531 Coraor, N., Grüning, B.A., Guerler, A., Hillman-Jackson, J., Hiltmann, S., Jalili, V., Rasche,  
532 H., Soranzo, N., Goecks, J., Taylor, J., Nekrutenko, A., Blankenberg, D., 2018. The Galaxy  
533 platform for accessible, reproducible and collaborative biomedical analyses: 2018 update.  
534 *Nucleic Acids Research* 46, W537-W544. <https://doi.org/10.1093/nar/gky379>.
- 535 Almeida, D.A., Horta, M.A.C., Ferreira Filho, J.A., Murad, N.F., de Souza, A.P., 2021. The  
536 synergistic actions of hydrolytic genes reveal the mechanism of *Trichoderma harzianum* for  
537 cellulose degradation. *Journal of Biotechnology* 334, 1-10.  
538 <https://doi.org/https://doi.org/10.1016/j.jbiotec.2021.05.001>.
- 539 Amore, A., Knott, B.C., Supekar, N.T., Shajahan, A., Azadi, P., Zhao, P., Wells, L., Linger, J.G.,  
540 Hobdey, S.E., Vander Wall, T.A., Shollenberger, T., Yarbrough, J.M., Tan, Z., Crowley,  
541 M.F., Himmel, M.E., Decker, S.R., Beckham, G.T., Taylor, L.E., 2nd, 2017. Distinct roles of  
542 N- and O-glycans in cellulase activity and stability. *Proceedings of the National Academy of*  
543 *Sciences of the United States of America* 114, 13667-13672.  
544 <https://doi.org/10.1073/pnas.1714249114>.
- 545 Andersen, M.R., Salazar, M.P., Schaap, P.J., van de Vondervoort, P.J.I., Culley, D., Thykaer, J.,  
546 Frisvad, J.C., Nielsen, K.F., Albang, R., Albermann, K., Berka, R.M., Braus, G.H., Braus-  
547 Stromeyer, S.A., Corrochano, L.M., Dai, Z., van Dijck, P.W.M., Hofmann, G., Lasure, L.L.,  
548 Magnuson, J.K., Menke, H., Meijer, M., Meijer, S.L., Nielsen, J.B., Nielsen, M.L., van  
549 Ooyen, A.J.J., Pel, H.J., Poulsen, L., Samson, R.A., Stam, H., Tsang, A., van den Brink, J.M.,  
550 Atkins, A., Aerts, A., Shapiro, H., Pangilinan, J., Salamov, A., Lou, Y., Lindquist, E., Lucas,  
551 S., Grimwood, J., Grigoriev, I.V., Kubicek, C.P., Martinez, D., van Peij, N.N.M.E., Roubos,  
552 J.A., Nielsen, J., Baker, S.E., 2011. Comparative genomics of citric-acid-producing  
553 *Aspergillus niger* ATCC 1015 versus enzyme-producing CBS 513.88. *Genome research* 21,  
554 885-897. <https://doi.org/10.1101/gr.112169.110>.
- 555 Ardèvol, A., Rovira, C., 2015. Reaction Mechanisms in Carbohydrate-Active Enzymes: Glycoside  
556 Hydrolases and Glycosyltransferases. Insights from ab Initio Quantum Mechanics/Molecular  
557 Mechanics Dynamic Simulations. *Journal of the American Chemical Society* 137, 7528-7547.  
558 <https://doi.org/10.1021/jacs.5b01156>.
- 559 Ardui, S., Ameer, A., Vermeesch, J.R., Hestand, M.S., 2018. Single molecule real-time (SMRT)  
560 sequencing comes of age: applications and utilities for medical diagnostics. *Nucleic Acids*  
561 *Research* 46, 2159-2168. <https://doi.org/10.1093/nar/gky066>.

- 562 Arntzen, M.Ø., Bengtsson, O., Várnai, A., Delogu, F., Mathiesen, G., Eijsink, V.G.H., 2020.  
563 Quantitative comparison of the biomass-degrading enzyme repertoires of five filamentous  
564 fungi. *Scientific Reports* 10, 20267. <https://doi.org/10.1038/s41598-020-75217-z>.
- 565 Badet, T., Fouché, S., Hartmann, F.E., Zala, M., Croll, D., 2021. Machine-learning predicts genomic  
566 determinants of meiosis-driven structural variation in a eukaryotic pathogen. *Nature*  
567 *Communications* 12, 3551. <https://doi.org/10.1038/s41467-021-23862-x>.
- 568 Baroncelli, R., Piaggieschi, G., Fiorini, L., Bertolini, E., Zapparata, A., Pè Mario, E., Sarrocco, S.,  
569 Vannacci, G., Draft Whole-Genome Sequence of the Biocontrol Agent *Trichoderma*  
570 *harzianum* T6776. *Genome Announcements* 3, e00647-00615.  
571 <https://doi.org/10.1128/genomeA.00647-15>.
- 572 Baroncelli, R., Piaggieschi, G., Fiorini, L., Bertolini, E., Zapparata, A., Pè, M.E., Sarrocco, S.,  
573 Vannacci, G., 2015. Draft Whole-Genome Sequence of the Biocontrol Agent *Trichoderma*  
574 *harzianum* T6776. *Genome announcements* 3, e00647-00615.  
575 <https://doi.org/10.1128/genomeA.00647-15>.
- 576 Basile, A., De Pascale, F., Bianca, F., Rossi, A., Frizzarin, M., De Bernardini, N., Bosaro, M.,  
577 Baldisseri, A., Antoniali, P., Lopreiato, R., Treu, L., Campanaro, S., 2021. Large-scale  
578 sequencing and comparative analysis of oenological *Saccharomyces cerevisiae* strains  
579 supported by nanopore refinement of key genomes. *Food Microbiology* 97, 103753.  
580 <https://doi.org/https://doi.org/10.1016/j.fm.2021.103753>.
- 581 Beckham, G.T., Dai, Z., Matthews, J.F., Momany, M., Payne, C.M., Adney, W.S., Baker, S.E.,  
582 Himmel, M.E., 2012. Harnessing glycosylation to improve cellulase activity. *Current Opinion*  
583 *in Biotechnology* 23, 338-345. <https://doi.org/https://doi.org/10.1016/j.copbio.2011.11.030>.
- 584 Bischof, R.H., Ramoni, J., Seiboth, B., 2016. Cellulases and beyond: the first 70 years of the enzyme  
585 producer *Trichoderma reesei*. *Microb. Cell Fact.* 15, 106. [https://doi.org/10.1186/s12934-016-](https://doi.org/10.1186/s12934-016-0507-6)  
586 [0507-6](https://doi.org/10.1186/s12934-016-0507-6).
- 587 Buchfink, B., Xie, C., Huson, D.H., 2015. Fast and sensitive protein alignment using DIAMOND.  
588 *Nature Methods* 12, 59-60. <https://doi.org/10.1038/nmeth.3176>.
- 589 Busk, P.K., Pilgaard, B., Lezyk, M.J., Meyer, A.S., Lange, L., 2017. Homology to peptide pattern for  
590 annotation of carbohydrate-active enzymes and prediction of function. *BMC bioinformatics*  
591 18, 214-214. <https://doi.org/10.1186/s12859-017-1625-9>.
- 592 Cantalapiedra, C.P., Hernández-Plaza, A., Letunic, I., Bork, P., Huerta-Cepas, J., 2021. eggNOG-  
593 mapper v2: Functional Annotation, Orthology Assignments, and Domain Prediction at the  
594 Metagenomic Scale. *bioRxiv* 2021.2006.2003.446934.  
595 <https://doi.org/10.1101/2021.06.03.446934>.
- 596 Cantarel, B.L., Coutinho, P.M., Rancurel, C., Bernard, T., Lombard, V., Henrissat, B., 2009. The  
597 Carbohydrate-Active EnZymes database (CAZY): an expert resource for Glycogenomics.  
598 *Nucleic acids research* 37, D233-D238. <https://doi.org/10.1093/nar/gkn663>.

- 599 Cantarel, B.L., Korf, I., Robb, S.M.C., Parra, G., Ross, E., Moore, B., Holt, C., Sánchez Alvarado,  
600 A., Yandell, M., 2008. MAKER: an easy-to-use annotation pipeline designed for emerging  
601 model organism genomes. *Genome research* 18, 188-196. <https://doi.org/10.1101/gr.6743907>.
- 602 Chaverri, P., Branco-Rocha, F., Jaklitsch, W., Gazis, R., Degenkolb, T., Samuels, G.J., 2015.  
603 Systematics of the *Trichoderma harzianum* species complex and the re-identification of  
604 commercial biocontrol strains. *Mycologia* 107, 558-590. <https://doi.org/10.3852/14-147>.
- 605 Chukwuma, O.B., Rafatullah, M., Tajarudin, H.A., Ismail, N., 2020. Lignocellulolytic Enzymes in  
606 Biotechnological and Industrial Processes: A Review. *Sustainability* 12,  
607 <https://doi.org/10.3390/su12187282>.
- 608 Chung, D., Kwon, Y.M., Yang, Y., 2021. Telomere-to-telomere genome assembly of asparaginase-  
609 producing *Trichoderma simmonsii*. *BMC Genomics* 22, 830. [https://doi.org/10.1186/s12864-](https://doi.org/10.1186/s12864-021-08162-4)  
610 [021-08162-4](https://doi.org/10.1186/s12864-021-08162-4).
- 611 Cingolani, P., Platts, A., Wang, L.L., Coon, M., Nguyen, T., Wang, L., Land, S.J., Lu, X., Ruden,  
612 D.M., 2012. A program for annotating and predicting the effects of single nucleotide  
613 polymorphisms, SnpEff: SNPs in the genome of *Drosophila melanogaster* strain w1118; iso-  
614 2; iso-3. *Fly* 6, 80-92. <https://doi.org/10.4161/fly.19695>.
- 615 Corrêa, C.L., Midorikawa, G.E.O., Filho, E.X.F., Noronha, E.F., Alves, G.S.C., Togawa, R.C., Silva-  
616 Junior, O.B., Costa, M.M.d.C., Grynberg, P., Miller, R.N.G., 2020. Transcriptome Profiling-  
617 Based Analysis of Carbohydrate-Active Enzymes in *Aspergillus terreus* Involved in Plant  
618 Biomass Degradation. *Frontiers in Bioengineering and Biotechnology* 8,  
619 <https://doi.org/10.3389/fbioe.2020.564527>.
- 620 Courtine, D., Provaznik, J., Reboul, J., Blanc, G., Benes, V., Ewbank, J.J., 2020. Long-read only  
621 assembly of *Drechmeria coniospora* genomes reveals widespread chromosome plasticity and  
622 illustrates the limitations of current nanopore methods. *GigaScience* 9,  
623 <https://doi.org/10.1093/gigascience/giaa099>.
- 624 Couturier, M., Ladevèze, S., Sulzenbacher, G., Ciano, L., Fanuel, M., Moreau, C., Villares, A.,  
625 Cathala, B., Chaspoul, F., Frandsen, K.E., Labourel, A., Herpoël-Gimbert, I., Grisel, S., Haon,  
626 M., Lenfant, N., Rogniaux, H., Ropartz, D., Davies, G.J., Rosso, M.-N., Walton, P.H.,  
627 Henrissat, B., Berrin, J.-G., 2018. Lytic xylan oxidases from wood-decay fungi unlock  
628 biomass degradation. *Nature Chemical Biology* 14, 306-310.  
629 <https://doi.org/10.1038/nchembio.2558>.
- 630 Crucello, A., Sforça, D.A., Horta, M.A.C., dos Santos, C.A., Viana, A.J.C., Beloti, L.L., de Toledo,  
631 M.A.S., Vincentz, M., Kuroshu, R.M., de Souza, A.P., 2015. Analysis of Genomic Regions of  
632 *Trichoderma harzianum* IOC-3844 Related to Biomass Degradation. *PLOS ONE* 10,  
633 e0122122. <https://doi.org/10.1371/journal.pone.0122122>.
- 634 Dal Molin, A., Minio, A., Griggio, F., Delledonne, M., Infantino, A., Aragona, M., 2018. The  
635 genome assembly of the fungal pathogen *Pyrenochaeta lycopersici* from Single-Molecule  
636 Real-Time sequencing sheds new light on its biological complexity. *PLOS ONE* 13,  
637 e0200217. <https://doi.org/10.1371/journal.pone.0200217>.

- 638 Dana, C.M., Dotson-Fagerstrom, A., Roche, C.M., Kal, S.M., Chokhawala, H.A., Blanch, H.W.,  
639 Clark, D.S., 2014. The importance of pyroglutamate in cellulase Cel7A. *Biotechnology and*  
640 *Bioengineering* 111, 842-847. [https://doi.org/https://doi.org/10.1002/bit.25178](https://doi.org/10.1002/bit.25178).
- 641 de Vries, R.P., Riley, R., Wiebenga, A., Aguilar-Osorio, G., Amillis, S., Uchima, C.A., Anderluh, G.,  
642 Asadollahi, M., Askin, M., Barry, K., Battaglia, E., Bayram, Ö., Benocci, T., Braus-  
643 Stromeyer, S.A., Caldana, C., Cánovas, D., Cerqueira, G.C., Chen, F., Chen, W., Choi, C.,  
644 Clum, A., dos Santos, R.A.C., Damásio, A.R.d.L., Diallinas, G., Emri, T., Fekete, E., Flipphi,  
645 M., Freyberg, S., Gallo, A., Gournas, C., Habgood, R., Hainaut, M., Harispe, M.L., Henrissat,  
646 B., Hildén, K.S., Hope, R., Hossain, A., Karabika, E., Karaffa, L., Karányi, Z., Kraševc, N.,  
647 Kuo, A., Kusch, H., LaButti, K., Lagendijk, E.L., Lapidus, A., Levasseur, A., Lindquist, E.,  
648 Lipzen, A., Logrieco, A.F., MacCabe, A., Mäkelä, M.R., Malavazi, I., Melin, P., Meyer, V.,  
649 Mielnichuk, N., Miskei, M., Molnár, Á.P., Mulé, G., Ngan, C.Y., Orejas, M., Orosz, E.,  
650 Ouedraogo, J.P., Overkamp, K.M., Park, H.-S., Perrone, G., Piumi, F., Punt, P.J., Ram, A.F.J.,  
651 Ramón, A., Rauscher, S., Record, E., Riaño-Pachón, D.M., Robert, V., Röhrig, J., Ruller, R.,  
652 Salamov, A., Salih, N.S., Samson, R.A., Sándor, E., Sanguinetti, M., Schütze, T., Sepčić, K.,  
653 Shelest, E., Sherlock, G., Sophianopoulou, V., Squina, F.M., Sun, H., Susca, A., Todd, R.B.,  
654 Tsang, A., Unkles, S.E., van de Wiele, N., van Rossen-Uffink, D., Oliveira, J.V.d.C., Vesth,  
655 T.C., Visser, J., Yu, J.-H., Zhou, M., Andersen, M.R., Archer, D.B., Baker, S.E., Benoit, I.,  
656 Brakhage, A.A., Braus, G.H., Fischer, R., Frisvad, J.C., Goldman, G.H., Houbroken, J.,  
657 Oakley, B., Pócsi, I., Scazzocchio, C., Seiboth, B., vanKuyk, P.A., Wortman, J., Dyer, P.S.,  
658 Grigoriev, I.V., 2017. Comparative genomics reveals high biological diversity and specific  
659 adaptations in the industrially and medically important fungal genus *Aspergillus*. *Genome*  
660 *Biology* 18, 28. <https://doi.org/10.1186/s13059-017-1151-0>.
- 661 Delabona, P.D.S., Codima, C.A., Ramoni, J., Zubieta, M.P., de Araujo, B.M., Farinas, C.S., Pradella,  
662 J., Seiboth, B., 2020a. The impact of putative methyltransferase overexpression on the  
663 *Trichoderma harzianum* cellulolytic system for biomass conversion. *Bioresour Technol* 313,  
664 123616. <https://doi.org/10.1016/j.biortech.2020.123616>.
- 665 Delabona, P.D.S., Codima, C.A., Ramoni, J., Zubieta, M.P., de Araujo, B.M., Farinas, C.S., Pradella,  
666 J., Seiboth, B., 2020b. The impact of putative methyltransferase overexpression on the  
667 *Trichoderma harzianum* cellulolytic system for biomass conversion. *Bioresour. Technol.* 313,  
668 123616. <https://doi.org/10.1016/j.biortech.2020.123616>.
- 669 Dodd, S.L., Lieckfeldt, E., Samuels, G.J., 2003. *Hypocrea atroviridis* sp. nov., the teleomorph of  
670 *Trichoderma atroviride*. *Mycologia* 95, 27-40.  
671 <https://doi.org/10.1080/15572536.2004.11833129>.
- 672 Druzhinina, I.S., Chenthamara, K., Zhang, J., Atanasova, L., Yang, D., Miao, Y., Rahimi, M.J.,  
673 Grujic, M., Cai, F., Pourmehdi, S., Salim, K.A., Pretzer, C., Kopchinskiy, A.G., Henrissat, B.,  
674 Kuo, A., Hundley, H., Wang, M., Aerts, A., Salamov, A., Lipzen, A., LaButti, K., Barry, K.,  
675 Grigoriev, I.V., Shen, Q., Kubicek, C.P., 2018a. Massive lateral transfer of genes encoding  
676 plant cell wall-degrading enzymes to the mycoparasitic fungus *Trichoderma* from its plant-  
677 associated hosts. *PLoS genetics* 14, e1007322-e1007322.  
678 <https://doi.org/10.1371/journal.pgen.1007322>.
- 679 Druzhinina, I.S., Chenthamara, K., Zhang, J., Atanasova, L., Yang, D., Miao, Y., Rahimi, M.J.,  
680 Grujic, M., Cai, F., Pourmehdi, S., Salim, K.A., Pretzer, C., Kopchinskiy, A.G., Henrissat, B.,



- 681 Kuo, A., Hundley, H., Wang, M., Aerts, A., Salamov, A., Lipzen, A., LaButti, K., Barry, K.,  
682 Grigoriev, I.V., Shen, Q., Kubicek, C.P., 2018b. Massive lateral transfer of genes encoding  
683 plant cell wall-degrading enzymes to the mycoparasitic fungus *Trichoderma* from its plant-  
684 associated hosts. *PLOS Genetics* 14, e1007322. <https://doi.org/10.1371/journal.pgen.1007322>.
- 685 Druzhinina, I.S., Kopchinskiy, A.G., Kubicek, C.P., 2006. The first 100 *Trichoderma* species  
686 characterized by molecular data. *Mycoscience* 47, 55-64. [https://doi.org/10.1007/s10267-006-](https://doi.org/10.1007/s10267-006-0279-7)  
687 [0279-7](https://doi.org/10.1007/s10267-006-0279-7).
- 688 Druzhinina, I.S., Kubicek, C.P., Komoń-Zelazowska, M., Mulaw, T.B., Bissett, J., 2010. The  
689 *Trichoderma harzianum* demon: complex speciation history resulting in coexistence of  
690 hypothetical biological species, recent agamospecies and numerous relict lineages. *BMC*  
691 *Evolutionary Biology* 10, 94. <https://doi.org/10.1186/1471-2148-10-94>.
- 692 Emms, D.M., Kelly, S., 2015. OrthoFinder: solving fundamental biases in whole genome  
693 comparisons dramatically improves orthogroup inference accuracy. *Genome Biology* 16, 157.  
694 <https://doi.org/10.1186/s13059-015-0721-2>.
- 695 Emms, D.M., Kelly, S., 2017. STRIDE: Species Tree Root Inference from Gene Duplication Events.  
696 *Molecular Biology and Evolution* 34, 3267-3278. <https://doi.org/10.1093/molbev/msx259>.
- 697 Emms, D.M., Kelly, S., 2018. STAG: Species Tree Inference from All Genes. *bioRxiv* 267914.  
698 <https://doi.org/10.1101/267914>.
- 699 Emms, D.M., Kelly, S., 2019. OrthoFinder: phylogenetic orthology inference for comparative  
700 genomics. *Genome Biology* 20, 238. <https://doi.org/10.1186/s13059-019-1832-y>.
- 701 Fanelli, F., Liuzzi, V.C., Logrieco, A.F., Altomare, C., 2018. Genomic characterization of  
702 *Trichoderma atrobrunneum* (*T. harzianum* species complex) ITEM 908: insight into the  
703 genetic endowment of a multi-target biocontrol strain. *BMC Genomics* 19, 662.  
704 <https://doi.org/10.1186/s12864-018-5049-3>.
- 705 Fang, H., Li, C., Zhao, J., Zhao, C., 2021. Biotechnological Advances and Trends in Engineering  
706 *Trichoderma reesei* towards Cellulase Hyperproducer. *Biotechnology and Bioprocess*  
707 *Engineering* 26, 517-528. <https://doi.org/10.1007/s12257-020-0243-y>.
- 708 Ferreira Filho, J.A., Horta, M.A.C., Beloti, L.L., dos Santos, C.A., de Souza, A.P., 2017.  
709 Carbohydrate-active enzymes in *Trichoderma harzianum*: a bioinformatic analysis  
710 bioprospecting for key enzymes for the biofuels industry. *BMC Genomics* 18, 779.  
711 <https://doi.org/10.1186/s12864-017-4181-9>.
- 712 Finn, R.D., Clements, J., Eddy, S.R., 2011. HMMER web server: interactive sequence similarity  
713 searching. *Nucleic acids research* 39, W29-W37. <https://doi.org/10.1093/nar/gkr367>.
- 714 Fraceto, L.F., Maruyama, C.R., Guilger, M., Mishra, S., Keswani, C., Singh, H.B., de Lima, R.,  
715 2018. *Trichoderma harzianum*-based novel formulations: potential applications for  
716 management of Next-Gen agricultural challenges. *Journal of Chemical Technology &*  
717 *Biotechnology* 93, 2056-2063. <https://doi.org/https://doi.org/10.1002/jctb.5613>.

- 718 Gan, X., Cao, D., Zhang, Z., Cheng, S., Wei, L., Li, S., Liu, B., 2020. Draft Genome Assembly of  
719 *Floccularia luteovirens*, an Edible and Symbiotic Mushroom on Qinghai-Tibet Plateau. *G3: Genes|Genomes|Genetics* 10, 1167. <https://doi.org/10.1534/g3.120.401037>.
- 721 Ganesh Kumar, A., Manisha, D., Sujitha, K., Magesh Peter, D., Kirubakaran, R., Dharani, G., 2021.  
722 Genome sequence analysis of deep sea *Aspergillus sydowii* BOBA1 and effect of high  
723 pressure on biodegradation of spent engine oil. *Scientific Reports* 11, 9347.  
724 <https://doi.org/10.1038/s41598-021-88525-9>.
- 725 Guo, B., Sato, N., Biely, P., Amano, Y., Nozaki, K., 2016. Comparison of catalytic properties of  
726 multiple  $\beta$ -glucosidases of *Trichoderma reesei*. *Applied Microbiology and Biotechnology*  
727 100, 4959-4968. <https://doi.org/10.1007/s00253-016-7342-x>.
- 728 Gurevich, A., Saveliev, V., Vyahhi, N., Tesler, G., 2013. QUAST: quality assessment tool for  
729 genome assemblies. *Bioinformatics (Oxford, England)* 29, 1072-1075.  
730 <https://doi.org/10.1093/bioinformatics/btt086>.
- 731 Hagestad, O.C., Hou, L., Andersen, J.H., Hansen, E.H., Altermark, B., Li, C., Kuhnert, E., Cox, R.J.,  
732 Crous, P.W., Spatafora, J.W., Lail, K., Amirebrahimi, M., Lipzen, A., Pangilinan, J.,  
733 Andreopoulos, W., Hayes, R.D., Ng, V., Grigoriev, I.V., Jackson, S.A., Sutton, T.D.S.,  
734 Dobson, A.D.W., Rämä, T., 2021. Genomic characterization of three marine fungi, including  
735 *Emericellopsis atlantica* sp. nov. with signatures of a generalist lifestyle and marine biomass  
736 degradation. *IMA Fungus* 12, 21. <https://doi.org/10.1186/s43008-021-00072-0>.
- 737 Han, L., Tan, Y., Ma, W., Niu, K., Hou, S., Guo, W., Liu, Y., Fang, X., 2020. Precision Engineering  
738 of the Transcription Factor Cre1 in *Hypocrea jecorina* (*Trichoderma reesei*) for Efficient  
739 Cellulase Production in the Presence of Glucose. *Frontiers in bioengineering and  
740 biotechnology* 8, 852-852. <https://doi.org/10.3389/fbioe.2020.00852>.
- 741 Horta, M.A.C., Filho, J.A.F., Murad, N.F., de Oliveira Santos, E., dos Santos, C.A., Mendes, J.S.,  
742 Brandão, M.M., Azzoni, S.F., de Souza, A.P., 2018. Network of proteins, enzymes and genes  
743 linked to biomass degradation shared by *Trichoderma* species. *Scientific Reports* 8, 1341.  
744 <https://doi.org/10.1038/s41598-018-19671-w>.
- 745 Horta, M.A.C., Thieme, N., Gao, Y., Burnum-Johnson, K.E., Nicora, C.D., Gritsenko, M.A., Lipton,  
746 M.S., Mohanraj, K., de Assis, L.J., Lin, L., Tian, C., Braus, G.H., Borkovich, K.A., Schmoll,  
747 M., Larrondo, L.F., Samal, A., Goldman, G.H., Benz, J.P., 2019. Broad Substrate-Specific  
748 Phosphorylation Events Are Associated With the Initial Stage of Plant Cell Wall Recognition  
749 in *Neurospora crassa*. *Frontiers in Microbiology* 10,  
750 <https://doi.org/10.3389/fmicb.2019.02317>.
- 751 Horta, M.A.C., Vicentini, R., Delabona, P.d.S., Laborda, P., Crucello, A., Freitas, S., Kuroshu, R.M.,  
752 Polikarpov, I., Pradella, J.G.d.C., Souza, A.P., 2014. Transcriptome Profile of *Trichoderma*  
753 *harzianum* IOC-3844 Induced by Sugarcane Bagasse. *PLOS ONE* 9, e88689.  
754 <https://doi.org/10.1371/journal.pone.0088689>.
- 755 Institute, B., Picard Tools. Picard. Broad Institute, GitHub repository.

- 756 Kappel, L., Münsterkötter, M., Sipos, G., Escobar Rodriguez, C., Gruber, S., 2020. Chitin and  
757 chitosan remodeling defines vegetative development and *Trichoderma* biocontrol. PLOS  
758 Pathogens 16, e1008320. <https://doi.org/10.1371/journal.ppat.1008320>.
- 759 Kidwai, M.K., Nehra, M., 2017. Biotechnological applications of *Trichoderma* species for  
760 environmental and food security, in: Gahlawat, S.K., Salar, R.K., Siwach, P., Duhan, J.S.,  
761 Kumar, S., Kaur, P. (Eds.), Plant biotechnology: recent advancements and developments.  
762 Springer, Singapore, pp. 125-156.
- 763 Kjærboelling, I., Vesth, T., Frisvad, J.C., Nybo, J.L., Theobald, S., Kildgaard, S., Petersen, T.I., Kuo,  
764 A., Sato, A., Lyhne, E.K., Kogle, M.E., Wiebenga, A., Kun, R.S., Lubbers, R.J.M., Mäkelä,  
765 M.R., Barry, K., Chovatia, M., Clum, A., Daum, C., Haridas, S., He, G., LaButti, K., Lipzen,  
766 A., Mondo, S., Pangilinan, J., Riley, R., Salamov, A., Simmons, B.A., Magnuson, J.K.,  
767 Henrissat, B., Mortensen, U.H., Larsen, T.O., de Vries, R.P., Grigoriev, I.V., Machida, M.,  
768 Baker, S.E., Andersen, M.R., 2020. A comparative genomics study of 23 *Aspergillus* species  
769 from section Flavi. Nature Communications 11, 1106. <https://doi.org/10.1038/s41467-019-14051-y>.
- 771 Koren, S., Walenz, B.P., Berlin, K., Miller, J.R., Bergman, N.H., Phillippy, A.M., 2017. Canu:  
772 scalable and accurate long-read assembly via adaptive k-mer weighting and repeat separation.  
773 Genome research 27, 722-736. <https://doi.org/10.1101/gr.215087.116>.
- 774 Krogh, A., Larsson, B., von Heijne, G., Sonnhammer, E.L.L., 2001. Predicting transmembrane  
775 protein topology with a hidden markov model: application to complete genomes 1 Edited by  
776 F. Cohen. Journal of Molecular Biology 305, 567-580.  
777 <https://doi.org/https://doi.org/10.1006/jmbi.2000.4315>.
- 778 Kubicek, C.P., Herrera-Estrella, A., Seidl-Seiboth, V., Martinez, D.A., Druzhinina, I.S., Thon, M.,  
779 Zeilinger, S., Casas-Flores, S., Horwitz, B.A., Mukherjee, P.K., Mukherjee, M., Kredics, L.,  
780 Alcaraz, L.D., Aerts, A., Antal, Z., Atanasova, L., Cervantes-Badillo, M.G., Challacombe, J.,  
781 Chertkov, O., McCluskey, K., Couplier, F., Deshpande, N., von Döhren, H., Ebbole, D.J.,  
782 Esquivel-Naranjo, E.U., Fekete, E., Flipphi, M., Glaser, F., Gómez-Rodríguez, E.Y., Gruber,  
783 S., Han, C., Henrissat, B., Hermosa, R., Hernández-Oñate, M., Karaffa, L., Kostı, I., Le  
784 Crom, S., Lindquist, E., Lucas, S., Lübeck, M., Lübeck, P.S., Margeot, A., Metz, B., Misra,  
785 M., Nevalainen, H., Omann, M., Packer, N., Perrone, G., Uresti-Rivera, E.E., Salamov, A.,  
786 Schmoll, M., Seiboth, B., Shapiro, H., Sukno, S., Tamayo-Ramos, J.A., Tisch, D., Wiest, A.,  
787 Wilkinson, H.H., Zhang, M., Coutinho, P.M., Kenerley, C.M., Monte, E., Baker, S.E.,  
788 Grigoriev, I.V., 2011. Comparative genome sequence analysis underscores mycoparasitism as  
789 the ancestral life style of *Trichoderma*. Genome Biology 12, R40. <https://doi.org/10.1186/gb-2011-12-4-r40>.
- 791 Kubicek, C.P., Steindorff, A.S., Chenthamara, K., Manganiello, G., Henrissat, B., Zhang, J., Cai, F.,  
792 Kopchinskiy, A.G., Kubicek, E.M., Kuo, A., Barancelli, R., Sarrocco, S., Noronha, E.F.,  
793 Vannacci, G., Shen, Q., Grigoriev, I.V., Druzhinina, I.S., 2019. Evolution and comparative  
794 genomics of the most common *Trichoderma* species. BMC Genomics 20, 485.  
795 <https://doi.org/10.1186/s12864-019-5680-7>.
- 796 Kurtz, S., Phillippy, A., Delcher, A.L., Smoot, M., Shumway, M., Antonescu, C., Salzberg, S.L.,  
797 2004. Versatile and open software for comparing large genomes. Genome Biology 5, R12.  
798 <https://doi.org/10.1186/gb-2004-5-2-r12>.

- 799 Letunic, I., Bork, P., 2007. Interactive Tree Of Life (iTOL): an online tool for phylogenetic tree  
800 display and annotation. *Bioinformatics* 23, 127-128.  
801 <https://doi.org/10.1093/bioinformatics/btl529>.
- 802 Levasseur, A., Drula, E., Lombard, V., Coutinho, P.M., Henrissat, B., 2013. Expansion of the  
803 enzymatic repertoire of the CAZy database to integrate auxiliary redox enzymes.  
804 *Biotechnology for Biofuels* 6, 41. <https://doi.org/10.1186/1754-6834-6-41>.
- 805 Li, B., Walton, J.D., 2017. Functional diversity for biomass deconstruction in family 5 subfamily 5  
806 (GH5\_5) of fungal endo- $\beta$ 1,4-glucanases. *Applied Microbiology and Biotechnology* 101,  
807 4093-4101. <https://doi.org/10.1007/s00253-017-8168-x>.
- 808 Li, H., 2018. Minimap2: pairwise alignment for nucleotide sequences. *Bioinformatics* (Oxford,  
809 England) 34, 3094-3100. <https://doi.org/10.1093/bioinformatics/bty191>.
- 810 Li, H., Durbin, R., 2010. Fast and accurate long-read alignment with Burrows-Wheeler transform.  
811 *Bioinformatics* (Oxford, England) 26, 589-595.  
812 <https://doi.org/10.1093/bioinformatics/btp698>.
- 813 Li, W.-C., Huang, C.-H., Chen, C.-L., Chuang, Y.-C., Tung, S.-Y., Wang, T.-F., 2017. *Trichoderma*  
814 *reesei* complete genome sequence, repeat-induced point mutation, and partitioning of  
815 CAZyme gene clusters. *Biotechnology for Biofuels* 10, 170. [https://doi.org/10.1186/s13068-](https://doi.org/10.1186/s13068-017-0825-x)  
816 [017-0825-x](https://doi.org/10.1186/s13068-017-0825-x).
- 817 Mahmoud, M., Gobet, N., Cruz-Dávalos, D.I., Mounier, N., Dessimoz, C., Sedlazeck, F.J., 2019.  
818 Structural variant calling: the long and the short of it. *Genome Biology* 20, 246.  
819 <https://doi.org/10.1186/s13059-019-1828-7>.
- 820 Marçais, G., Delcher, A.L., Phillippy, A.M., Coston, R., Salzberg, S.L., Zimin, A., 2018. MUMmer4:  
821 A fast and versatile genome alignment system. *PLOS Computational Biology* 14, e1005944.  
822 <https://doi.org/10.1371/journal.pcbi.1005944>.
- 823 Martinez, D., Berka, R.M., Henrissat, B., Saloheimo, M., Arvas, M., Baker, S.E., Chapman, J.,  
824 Chertkov, O., Coutinho, P.M., Cullen, D., Danchin, E.G.J., Grigoriev, I.V., Harris, P.,  
825 Jackson, M., Kubicek, C.P., Han, C.S., Ho, I., Larrondo, L.F., de Leon, A.L., Magnuson, J.K.,  
826 Merino, S., Misra, M., Nelson, B., Putnam, N., Robbertse, B., Salamov, A.A., Schmoll, M.,  
827 Terry, A., Thayer, N., Westerholm-Parvinen, A., Schoch, C.L., Yao, J., Barabote, R., Nelson,  
828 M.A., Detter, C., Bruce, D., Kuske, C.R., Xie, G., Richardson, P., Rokhsar, D.S., Lucas, S.M.,  
829 Rubin, E.M., Dunn-Coleman, N., Ward, M., Brettin, T.S., 2008. Genome sequencing and  
830 analysis of the biomass-degrading fungus *Trichoderma reesei* (syn. *Hypocrea jecorina*).  
831 *Nature Biotechnology* 26, 553-560. <https://doi.org/10.1038/nbt1403>.
- 832 Medeiros, H.A., Filho, J.V.A., Freitas, L.G., Castillo, P., Rubio, M.B., Hermosa, R., Monte, E., 2017.  
833 Tomato progeny inherit resistance to the nematode *Meloidogyne javanica* linked to plant  
834 growth induced by the biocontrol fungus *Trichoderma atroviride*. *Sci Rep* 7, 40216.  
835 <https://doi.org/10.1038/srep40216>.
- 836 Mills, R.E., Walter, K., Stewart, C., Handsaker, R.E., Chen, K., Alkan, C., Abyzov, A., Yoon, S.C.,  
837 Ye, K., Cheetham, R.K., Chinwalla, A., Conrad, D.F., Fu, Y., Grubert, F., Hajirasouliha, I.,  
838 Hormozdiari, F., Iakoucheva, L.M., Iqbal, Z., Kang, S., Kidd, J.M., Konkel, M.K., Korn, J.,

- 839 Khurana, E., Kural, D., Lam, H.Y.K., Leng, J., Li, R., Li, Y., Lin, C.-Y., Luo, R., Mu, X.J.,  
840 Nemes, J., Peckham, H.E., Rausch, T., Scally, A., Shi, X., Stromberg, M.P., Stütz, A.M.,  
841 Urban, A.E., Walker, J.A., Wu, J., Zhang, Y., Zhang, Z.D., Batzer, M.A., Ding, L., Marth,  
842 G.T., McVean, G., Sebat, J., Snyder, M., Wang, J., Ye, K., Eichler, E.E., Gerstein, M.B.,  
843 Hurles, M.E., Lee, C., McCarroll, S.A., Korb, J.O., Genomes, P., 2011. Mapping copy  
844 number variation by population-scale genome sequencing. *Nature* 470, 59-65.  
845 <https://doi.org/10.1038/nature09708>.
- 846 Mitsuhashi, S., Matsumoto, N., 2020. Long-read sequencing for rare human genetic diseases. *Journal*  
847 *of Human Genetics* 65, 11-19. <https://doi.org/10.1038/s10038-019-0671-8>.
- 848 Miyauchi, S., Kiss, E., Kuo, A., Drula, E., Kohler, A., Sánchez-García, M., Morin, E., Andreopoulos,  
849 B., Barry, K.W., Bonito, G., Buée, M., Carver, A., Chen, C., Cichocki, N., Clum, A., Culley,  
850 D., Crous, P.W., Fauchery, L., Girlanda, M., Hayes, R.D., Kéri, Z., LaButti, K., Lipzen, A.,  
851 Lombard, V., Magnuson, J., Maillard, F., Murat, C., Nolan, M., Ohm, R.A., Pangilinan, J.,  
852 Pereira, M.d.F., Perotto, S., Peter, M., Pfister, S., Riley, R., Sitrit, Y., Stielow, J.B., Szöllösi,  
853 G., Žifčáková, L., Štursová, M., Spatafora, J.W., Tedersoo, L., Vaario, L.-M., Yamada, A.,  
854 Yan, M., Wang, P., Xu, J., Bruns, T., Baldrian, P., Vilgalys, R., Dunand, C., Henrissat, B.,  
855 Grigoriev, I.V., Hibbett, D., Nagy, L.G., Martin, F.M., 2020. Large-scale genome sequencing  
856 of mycorrhizal fungi provides insights into the early evolution of symbiotic traits. *Nature*  
857 *Communications* 11, 5125. <https://doi.org/10.1038/s41467-020-18795-w>.
- 858 Monclaro, A.V., Filho, E.X.F., 2017. Fungal lytic polysaccharide monooxygenases from family  
859 AA9: Recent developments and application in lignocellulose breakdown. *International*  
860 *Journal of Biological Macromolecules* 102, 771-778.  
861 <https://doi.org/https://doi.org/10.1016/j.ijbiomac.2017.04.077>.
- 862 Montoliu-Nerin, M., Sánchez-García, M., Bergin, C., Grabherr, M., Ellis, B., Kutschera, V.E.,  
863 Kierczak, M., Johannesson, H., Rosling, A., 2020. Building de novo reference genome  
864 assemblies of complex eukaryotic microorganisms from single nuclei. *Scientific Reports* 10,  
865 1303. <https://doi.org/10.1038/s41598-020-58025-3>.
- 866 Motta, M.L.L., Filho, J.A.F., de Melo, R.R., Zanphorlin, L.M., dos Santos, C.A., de Souza, A.P.,  
867 2021. A novel fungal metal-dependent  $\alpha$ -l-arabinofuranosidase of family 54 glycoside  
868 hydrolase shows expanded substrate specificity. *Scientific Reports* 11, 10961.  
869 <https://doi.org/10.1038/s41598-021-90490-2>.
- 870 Nagel, J.H., Wingfield, M.J., Slippers, B., 2021. Increased abundance of secreted hydrolytic enzymes  
871 and secondary metabolite gene clusters define the genomes of latent plant pathogens in the  
872 *Botryosphaeriaceae*. *BMC Genomics* 22, 589. <https://doi.org/10.1186/s12864-021-07902-w>.
- 873 Najjarzadeh, N., Matsakas, L., Rova, U., Christakopoulos, P., 2021. How Carbon Source and Degree  
874 of Oligosaccharide Polymerization Affect Production of Cellulase-Degrading Enzymes by  
875 *Fusarium oxysporum* f. sp. *lycopersici*. *Frontiers in Microbiology* 12,  
876 <https://doi.org/10.3389/fmicb.2021.652655>.
- 877 Nakkeeran, S., Marimuthu, T., Renukadevi, P., Brindhadevi, S., Jogaiah, S., 2021. 24 - Exploring the  
878 biogeographical diversity of *Trichoderma* for plant health, in: Jogaiah, S. (Ed.), *Biocontrol*  
879 *Agents and Secondary Metabolites*. Woodhead Publishing, pp. 537-571.

- 880 Okonechnikov, K., Conesa, A., García-Alcalde, F., 2016. Qualimap 2: advanced multi-sample  
881 quality control for high-throughput sequencing data. *Bioinformatics* (Oxford, England) 32,  
882 292-294. <https://doi.org/10.1093/bioinformatics/btv566>.
- 883 Priest, S.J., Yadav, V., Heitman, J., 2020. Advances in understanding the evolution of fungal genome  
884 architecture. *F1000Research* 9, F1000 Faculty Rev-1776.  
885 <https://doi.org/10.12688/f1000research.25424.1>.
- 886 Ramazi, S., Zahiri, J., 2021. Post-translational modifications in proteins: resources, tools and  
887 prediction methods. *Database* 2021, baab012. <https://doi.org/10.1093/database/baab012>.
- 888 Rosolen, R.R., Aono, A.H., Almeida, D.A., Filho, J.A.F., Horta, M.A.C., de Souza, A.P., 2021.  
889 Network analysis reveals different strategies of *Trichoderma* spp. associated with XYR1 and  
890 CRE1 during cellulose degradation. *bioRxiv* 2020.2005.2002.074344.  
891 <https://doi.org/10.1101/2020.05.02.074344>.
- 892 Sakamoto, Y., Sereewattanawoot, S., Suzuki, A., 2020. A new era of long-read sequencing for cancer  
893 genomics. *Journal of Human Genetics* 65, 3-10. <https://doi.org/10.1038/s10038-019-0658-5>.
- 894 Saravanakumar, K., Li, Y., Yu, C., Wang, Q.Q., Wang, M., Sun, J., Gao, J.X., Chen, J., 2017. Effect  
895 of *Trichoderma harzianum* on maize rhizosphere microbiome and biocontrol of Fusarium  
896 Stalk rot. *Sci Rep* 7, 1771. <https://doi.org/10.1038/s41598-017-01680-w>.
- 897 Schmoll, M., 2018. Regulation of plant cell wall degradation by light in *Trichoderma*. *Fungal*  
898 *Biology and Biotechnology* 5, 10. <https://doi.org/10.1186/s40694-018-0052-7>.
- 899 Schmoll, M., Dattenböck, C., Carreras-Villaseñor, N., Mendoza-Mendoza, A., Tisch, D., Alemán,  
900 M.I., Baker, S.E., Brown, C., Cervantes-Badillo, M.G., Cetz-Chel, J., Cristobal-Mondragon,  
901 G.R., Delaye, L., Esquivel-Naranjo, E.U., Frischmann, A., Gallardo-Negrete, J.d.J., García-  
902 Esquivel, M., Gomez-Rodriguez, E.Y., Greenwood, D.R., Hernández-Oñate, M., Kruszewska,  
903 J.S., Lawry, R., Mora-Montes, H.M., Muñoz-Centeno, T., Nieto-Jacobo, M.F., Nogueira  
904 Lopez, G., Olmedo-Monfil, V., Osorio-Concepcion, M., Piłsyk, S., Pomraning, K.R.,  
905 Rodriguez-Iglesias, A., Rosales-Saavedra, M.T., Sánchez-Arreguín, J.A., Seidl-Seiboth, V.,  
906 Stewart, A., Uresti-Rivera, E.E., Wang, C.-L., Wang, T.-F., Zeilinger, S., Casas-Flores, S.,  
907 Herrera-Estrella, A., 2016. The Genomes of Three Uneven Siblings: Footprints of the  
908 Lifestyles of Three *Trichoderma* Species. *Microbiology and molecular biology reviews* :  
909 *MMBR* 80, 205-327. <https://doi.org/10.1128/MMBR.00040-15>.
- 910 Sedlazeck, F.J., Rescheneder, P., Smolka, M., Fang, H., Nattestad, M., von Haeseler, A., Schatz,  
911 M.C., 2018. Accurate detection of complex structural variations using single-molecule  
912 sequencing. *Nature methods* 15, 461-468. <https://doi.org/10.1038/s41592-018-0001-7>.
- 913 Sharma, S., Kour, D., Rana, K.L., Dhiman, A., Thakur, S., Thakur, P., Thakur, S., Thakur, N.,  
914 Sudheer, S., Yadav, N., Yadav, A.N., Rastegari, A.A., Singh, K., 2019. *Trichoderma*:  
915 Biodiversity, Ecological Significances, and Industrial Applications, in: Yadav, A.N., Mishra,  
916 S., Singh, S., Gupta, A. (Eds.), *Recent Advancement in White Biotechnology Through Fungi*:  
917 Volume 1: Diversity and Enzymes Perspectives. Springer International Publishing, Cham, pp.  
918 85-120.

- 919 Simão, F.A., Waterhouse, R.M., Ioannidis, P., Kriventseva, E.V., Zdobnov, E.M., 2015. BUSCO:  
920 assessing genome assembly and annotation completeness with single-copy orthologs.  
921 *Bioinformatics* 31, 3210-3212. <https://doi.org/10.1093/bioinformatics/btv351>.
- 922 Stanke, M., Keller, O., Gunduz, I., Hayes, A., Waack, S., Morgenstern, B., 2006. AUGUSTUS: ab  
923 initio prediction of alternative transcripts. *Nucleic Acids Research* 34, W435-W439.  
924 <https://doi.org/10.1093/nar/gkl200>.
- 925 Tatusov, R.L., Galperin, M.Y., Natale, D.A., Koonin, E.V., 2000. The COG database: a tool for  
926 genome-scale analysis of protein functions and evolution. *Nucleic acids research* 28, 33-36.  
927 <https://doi.org/10.1093/nar/28.1.33>.
- 928 Thanh, V.N., Thuy, N.T., Huong, H.T.T., Hien, D.D., Hang, D.T.M., Anh, D.T.K., Hüttner, S.,  
929 Larsbrink, J., Olsson, L., 2019. Surveying of acid-tolerant thermophilic lignocellulolytic fungi  
930 in Vietnam reveals surprisingly high genetic diversity. *Scientific reports* 9, 3674-3674.  
931 <https://doi.org/10.1038/s41598-019-40213-5>.
- 932 The UniProt, C., 2021. UniProt: the universal protein knowledgebase in 2021. *Nucleic Acids*  
933 *Research* 49, D480-D489. <https://doi.org/10.1093/nar/gkaa1100>.
- 934 Törönen, P., Medlar, A., Holm, L., 2018. PANNZER2: a rapid functional annotation web server.  
935 *Nucleic acids research* 46, W84-W88. <https://doi.org/10.1093/nar/gky350>.
- 936 van Eerde, A., Várnai, A., Jameson, J.K., Paruch, L., Moen, A., Anonsen, J.H., Chylenski, P., Steen,  
937 H.S., Heldal, I., Bock, R., Eijsink, V.G.H., Liu-Clarke, J., 2020. In-depth characterization of  
938 *Trichoderma reesei* cellobiohydrolase TrCel7A produced in *Nicotiana benthamiana* reveals  
939 limitations of cellulase production in plants by host-specific post-translational modifications.  
940 *Plant biotechnology journal* 18, 631-643. <https://doi.org/10.1111/pbi.13227>.
- 941 Varga, T., Krizsán, K., Földi, C., Dima, B., Sánchez-García, M., Sánchez-Ramírez, S., Szöllősi, G.J.,  
942 Szarkándi, J.G., Papp, V., Albert, L., Andreopoulos, W., Angelini, C., Antonín, V., Barry,  
943 K.W., Bougher, N.L., Buchanan, P., Buyck, B., Bense, V., Catcheside, P., Chovatia, M.,  
944 Cooper, J., Dämon, W., Desjardin, D., Finy, P., Geml, J., Haridas, S., Hughes, K., Justo, A.,  
945 Karasiński, D., Kautmanova, I., Kiss, B., Kocsubé, S., Kotiranta, H., LaButti, K.M., Lechner,  
946 B.E., Liimatainen, K., Lipzen, A., Lukács, Z., Mihaltcheva, S., Morgado, L.N., Niskanen, T.,  
947 Noordeloos, M.E., Ohm, R.A., Ortiz-Santana, B., Ovrebo, C., Rácz, N., Riley, R., Savchenko,  
948 A., Shiryayev, A., Soop, K., Spirin, V., Szebenyi, C., Tomšovský, M., Tulloss, R.E., Uehling,  
949 J., Grigoriev, I.V., Vágvölgyi, C., Papp, T., Martín, F.M., Miettinen, O., Hibbett, D.S., Nagy,  
950 L.G., 2019. Megaphylogeny resolves global patterns of mushroom evolution. *Nature ecology*  
951 *& evolution* 3, 668-678. <https://doi.org/10.1038/s41559-019-0834-1>.
- 952 Wei, H., Wu, M., Fan, A., Su, H., 2021. Recombinant protein production in the filamentous fungus  
953 *Trichoderma*. *Chinese Journal of Chemical Engineering* 30, 74-81.  
954 <https://doi.org/https://doi.org/10.1016/j.cjche.2020.11.006>.
- 955 Wu, J.Q., Dong, C., Song, L., Park, R.F., 2020. Long-Read–Based de novo Genome Assembly and  
956 Comparative Genomics of the Wheat Leaf Rust Pathogen *Puccinia triticina* Identifies  
957 Candidates for Three Avirulence Genes. *Frontiers in Genetics* 11,  
958 <https://doi.org/10.3389/fgene.2020.00521>.

- 959 Wu, L., McCluskey, K., Desmeth, P., Liu, S., Hideaki, S., Yin, Y., Moriya, O., Itoh, T., Kim, C.Y.,  
960 Lee, J.-S., Zhou, Y., Kawasaki, H., Hazbón, M.H., Robert, V., Boekhout, T., Lima, N.,  
961 Evtushenko, L., Boundy-Mills, K., Bunk, B., Moore, E.R.B., Eurwilaichitr, L., Ingsriswang,  
962 S., Shah, H., Yao, S., Jin, T., Huang, J., Shi, W., Sun, Q., Fan, G., Li, W., Li, X., Kurtböke, İ.,  
963 Ma, J., 2018. The global catalogue of microorganisms 10K type strain sequencing project:  
964 closing the genomic gaps for the validly published prokaryotic and fungi species.  
965 GigaScience 7, <https://doi.org/10.1093/gigascience/giy026>.
- 966 Xie, B.-B., Qin, Q.-L., Shi, M., Chen, L.-L., Shu, Y.-L., Luo, Y., Wang, X.-W., Rong, J.-C., Gong,  
967 Z.-T., Li, D., Sun, C.-Y., Liu, G.-M., Dong, X.-W., Pang, X.-H., Huang, F., Liu, W., Chen,  
968 X.-L., Zhou, B.-C., Zhang, Y.-Z., Song, X.-Y., 2014. Comparative Genomics Provide Insights  
969 into Evolution of *Trichoderma* Nutrition Style. *Genome Biology and Evolution* 6, 379-390.  
970 <https://doi.org/10.1093/gbe/evu018>.
- 971 Zhang, H., Yohe, T., Huang, L., Entwistle, S., Wu, P., Yang, Z., Busk, P.K., Xu, Y., Yin, Y., 2018.  
972 dbCAN2: a meta server for automated carbohydrate-active enzyme annotation. *Nucleic Acids*  
973 *Research* 46, W95-W101. <https://doi.org/10.1093/nar/gky418>.
- 974 Zhang, Y., Yang, J., Luo, L., Wang, E., Wang, R., Liu, L., Liu, J., Yuan, H., 2020a. Low-cost  
975 cellulase-hemicellulase mixture secreted by *Trichoderma harzianum* EM0925 with complete  
976 saccharification efficacy of lignocellulose. *Int J Mol Sci* 21, 371.  
977 <https://doi.org/10.3390/ijms21020371>.
- 978 Zhang, Y., Yang, J., Luo, L., Wang, E., Wang, R., Liu, L., Liu, J., Yuan, H., 2020b. Low-cost  
979 cellulase-hemicellulase mixture secreted by *Trichoderma harzianum* EM0925 with complete  
980 saccharification efficacy of lignocellulose. *Int. J. Mol. Sci.* 21, 371.  
981 <https://doi.org/10.3390/ijms21020371>.
- 982 Zin, N.A., Badaluddin, N.A., 2020. Biological functions of *Trichoderma* spp. for agriculture  
983 applications. *Annals of Agricultural Sciences* 65, 168-178.  
984 <https://doi.org/https://doi.org/10.1016/j.aos.2020.09.003>.
- 985  
986  
987  
988  
989  
990  
991  
992  
993  
994  
995  
996  
997  
998  
999



1000 **Figure legends**

1001 **Figure 1. *Trichoderma* isolates evaluated in this study.** (A) Th3844, (B) Th0179, (C) Tr0711, and  
1002 (D) Ta0020 cultivated on potato dextrose broth (PDA) solid medium at 28 °C. After DNA extraction,  
1003 their genome was sequenced and assembled. Ta0020: *T. atroviride* CBMAI-0020; Th0179: *T.*  
1004 *harzianum* CBMAI-0179; Th3844: *T. harzianum* IOC-3844; Tr0711: *T. reesei* CBMAI-0711.

1005 **Figure 2. Comparisons between the genomes of the analyzed *Trichoderma* isolates and the *T.***  
1006 ***reesei* QM6a reference genome.** Dot plots of the assemblies of (A) Th3844, (B) Th0179, (C)  
1007 Ta0020, and (D) Tr0711 that were generated by Canu (y-axis) against those from *T. reesei* QM6a (x-  
1008 axis) that are available in the NCBI database. Ta0020: *T. atroviride* CBMAI-0020; Th0179: *T.*  
1009 *harzianum* CBMAI-0179; Th3844: *T. harzianum* IOC-3844; Tr0711: *T. reesei* CBMAI-0711.

1010 **Figure 3. COG functional category distribution of the *Trichoderma* isolates considered.** The plot  
1011 shows the number of genes in the genomes of (A) Th3844, (B) Th0179, (C) Ta0020, and (D) Tr0711,  
1012 in which a COG classification was obtained. The size of the boxes represents the abundance of the  
1013 genes at the level of individual COG families. Only the COG functional categories with more than a  
1014 hundred counts were represented. Ta0020: *T. atroviride* CBMAI-0020; Th0179: *T. harzianum*  
1015 CBMAI-0179; Th3844: *T. harzianum* IOC-3844; Tr0711: *T. reesei* CBMAI-0711.

1016 **Figure 4. Distribution of CAZymes in *Trichoderma* spp.** (A) The predicted CAZymes from the  
1017 assembled genomes were classified according to the CAZy database. (B) The secreted CAZymes  
1018 were grouped according to their CAZyme class. CAZymes: carbohydrate-active enzymes; Ta0020: *T.*  
1019 *atroviride* CBMAI-0020; Th0179: *T. harzianum* CBMAI-0179; Th3844: *T. harzianum* IOC-3844;  
1020 Tr0711: *T. reesei* CBMAI-0711. AA: auxiliary activity; CBM: carbohydrate-binding module; EC:  
1021 carbohydrate esterase; GH: glycosyl hydrolase; GT: glycosyl transferase; PL: polysaccharide lyase.

1022 **Figure 5. Quantitative comparison of the biomass-degrading enzyme repertoires of**  
1023 ***Trichoderma* isolates.** Heatmap of the number of enzymes in each CAZY family from the Th3844,  
1024 Th0179, Ta0020, and Tr0711 genomes. This map includes only the enzymes/proteins related to  
1025 biomass degradation. Ta0020: *T. atroviride* CBMAI-0020; Th0179: *T. harzianum* CBMAI-0179;  
1026 Th3844: *T. harzianum* IOC-3844; Tr0711: *T. reesei* CBMAI-0711; LPMOs: Lytic polysaccharide  
1027 monooxygenases; CDHs: Cellobiose dehydrogenases; PHDs: Pyranose dehydrogenases.

1028 **Figure 6. Phylogenetic relationships of *Trichoderma* spp. as inferred by an orthology analysis.**  
1029 The phylogenetic tree modeled by OrthoFinder software was based on the concatenation of 2,229  
1030 single copy orthogroups. In addition to the proteomes of Th3844, Th0179, Ta0020, and Tr0711, this  
1031 methodology shows the inferred relationships among 19 *Trichoderma* spp., for which the proteomes  
1032 are available in the NCBI database. *Fusarium* spp., *Aspergillus* spp., and *Neurospora* spp. were used  
1033 as the outgroup. Bootstrap values are shown at the nodes.

1034 **Figure 7. Structural variant heterogeneity across the genomes of the evaluated *Trichoderma***  
1035 **spp.** (A) Long-read alignment-based structural variant (SV) analyses among the evaluated  
1036 *Trichoderma* isolates and *T. reesei* QM6a showed breakends (BNDs), deletions (DELs), multiple  
1037 nucleotides and InDels (MIXEDs), duplications (DUPs), insertions (INSSs), and inversions (INVs)  
1038 between the genomes. (B) Functional effects of the identified SVs. Ta0020: *T. atroviride* CBMAI-  
1039 0020; Th0179: *T. harzianum* CBMAI-0179; Th3844: *T. harzianum* IOC-3844; Tr0711: *T. reesei*  
1040 CBMAI-0711.

1041

1042 **Tables**

1043 **Table 1.** Genome assembly and annotation statistics.

|                                            | <b>Th3844</b> | <b>Th0179</b> | <b>Ta0020</b> | <b>Tr0711</b> |
|--------------------------------------------|---------------|---------------|---------------|---------------|
| <b>Number of reads</b>                     | 418,031       | 504,913       | 458,142       | 282,252       |
| <b>Genome size (bp)</b>                    | 40,219,724    | 39,170,259    | 36,411,897    | 32,448,670    |
| <b>GC content (%)</b>                      | 47.5          | 49.4          | 49.5          | 53.5          |
| <b>N50 reads</b>                           | 3,607,994     | 2,983,622     | 3,146,023     | 1,694,659     |
| <b>L50 contigs</b>                         | 5             | 6             | 5             | 7             |
| <b>Number of contigs</b>                   | 15            | 18            | 14            | 26            |
| <b>Complete BUSCOs (%)</b>                 | 90.1          | 98.7          | 99            | 99.1          |
| <b>Complete and single-copy BUSCOs (%)</b> | 89.6          | 98.1          | 98.8          | 98.9          |
| <b>Complete and duplicated BUSCOs (%)</b>  | 0.5           | 0.6           | 0.2           | 0.2           |
| <b>Fragmented BUSCOs (%)</b>               | 0.2           | 0.2           | 0.1           | 0.1           |
| <b>Missing (%)</b>                         | 9.7           | 1.1           | 0.9           | 0.8           |
| <b>Number of predicted genes</b>           | 10,786        | 11,322        | 10,082        | 8,796         |
| <b>Number of annotated genes</b>           | 10,611        | 11,065        | 9,547         | 8,495         |

1044  
1045  
1046  
1047  
1048  
1049  
1050  
1051  
1052  
1053  
1054  
1055  
1056  
1057  
1058  
1059  
1060  
1061  
1062  
1063  
1064  
1065  
1066  
1067

1068 **Table 2.** Comparison of the genome features of *Trichoderma* spp. genomes.

| Species              | Strain     | Coverage | NCBI accession | Genome size (Mb) | GC content (%) | N50 reads | L50 contigs | Assembly level    | Genes  | Reference                 |
|----------------------|------------|----------|----------------|------------------|----------------|-----------|-------------|-------------------|--------|---------------------------|
| <i>T. harzianum</i>  | IOC-3844   | 164 x    | SAMN23309297   | 40               | 47.5           | 3,607,994 | 5           | Contigs (15)      | 10,786 | This study                |
| <i>T. harzianum</i>  | CBMAI-0179 | 219 x    | SAMN23309298   | 39               | 49.4           | 2,983,622 | 6           | Contigs (18)      | 11,322 | This study                |
| <i>T. harzianum</i>  | T6776      | 85 x     | SAMN02851310   | 39               | 48.5           | 68,846    | 178         | Scaffolds (1,572) | 11,501 | (Baroncelli et al., 2015) |
| <i>T. harzianum</i>  | CBS 226.95 | 120 x    | SAMN00761861   | 41               | 47.6           | 2,414,909 | 7           | Scaffolds (532)   | 14,269 | -                         |
| <i>T. virens</i>     | Gv29–8     | 8 x      | SAMN02744059   | 39               | 49.2           | 1,836,662 | 8           | Scaffolds (93)    | 12,405 | (Kubicek et al., 2011)    |
| <i>T. simmonsii</i>  | GH-Sj1     | -        | SAMN15516371   | 40               | 48.13          | 6,451,197 | 3           | Scaffolds (7)     | 13,296 | (Chung et al., 2021)      |
| <i>T. atroviride</i> | CBMAI-0020 | 229 x    | SAMN23309299   | 36               | 49.5           | 3,146,023 | 5           | Contigs (14)      | 10,082 | This study                |
| <i>T. atroviride</i> | IMI206040  | 8 x      | SAMN02744066   | 36               | 49.7           | 2,007,903 | 6           | Contigs (29)      | 11,809 | (Kubicek et al., 2011)    |
| <i>T. reesei</i>     | CBMAI-0711 | 143 x    | SAMN23309300   | 32               | 53.5           | 1,694,659 | 7           | Contigs (26)      | 8,796  | This study                |
| <i>T. reesei</i>     | QM6a       | 80 x     | SAMN05250858   | 35               | 51.0           | 18,236    | 3           | Chromosomes (7)   | 10,877 | (Li et al., 2017)         |
| <i>T. reesei</i>     | QM6a       | 9 x      | SAMN02746107   | 33               | 52.8           | 1,219,543 | 9           | Scaffolds (77)    | 9,109  | (Martinez et al., 2008)   |

1069

1070

1071

1072

1073

1074 **Table 3.** Distribution of Th3844, Th0179, Ta0020, and Tr0711 orthologs.

|               | <b>Th3844</b> | <b>Th0179</b> | <b>Ta0020</b> | <b>Tr0711</b> |
|---------------|---------------|---------------|---------------|---------------|
| <b>Th3844</b> | -             | 9,729         | 7,927         | 7,330         |
| <b>Th0179</b> | 9,729         | -             | 8,755         | 8,141         |
| <b>Ta0020</b> | 7,927         | 8,755         | -             | 7,784         |
| <b>Tr0711</b> | 7,330         | 8,141         | 7,784         | -             |

1075

**Th3844**

**A**

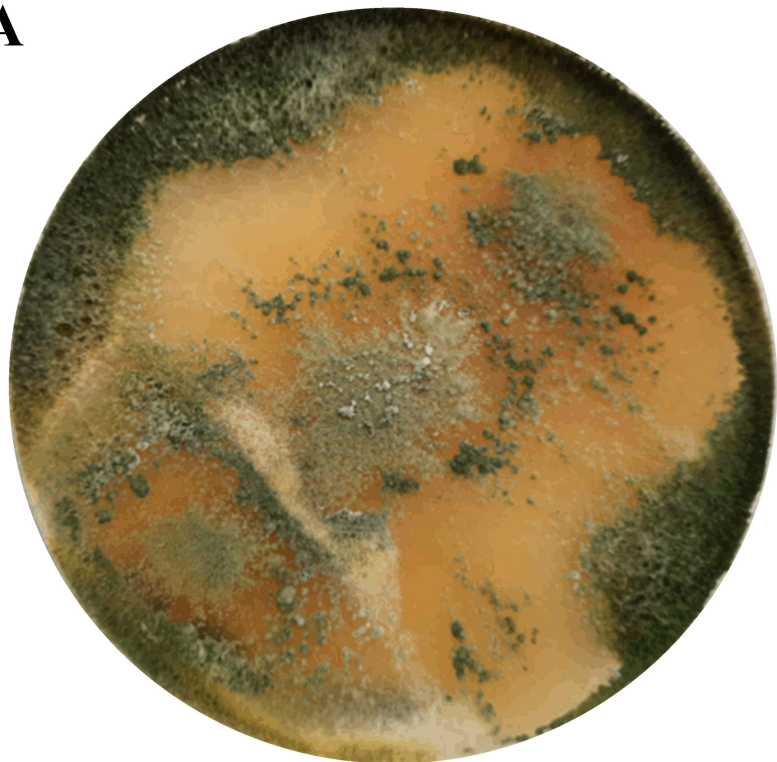

**Th0179**

**B**

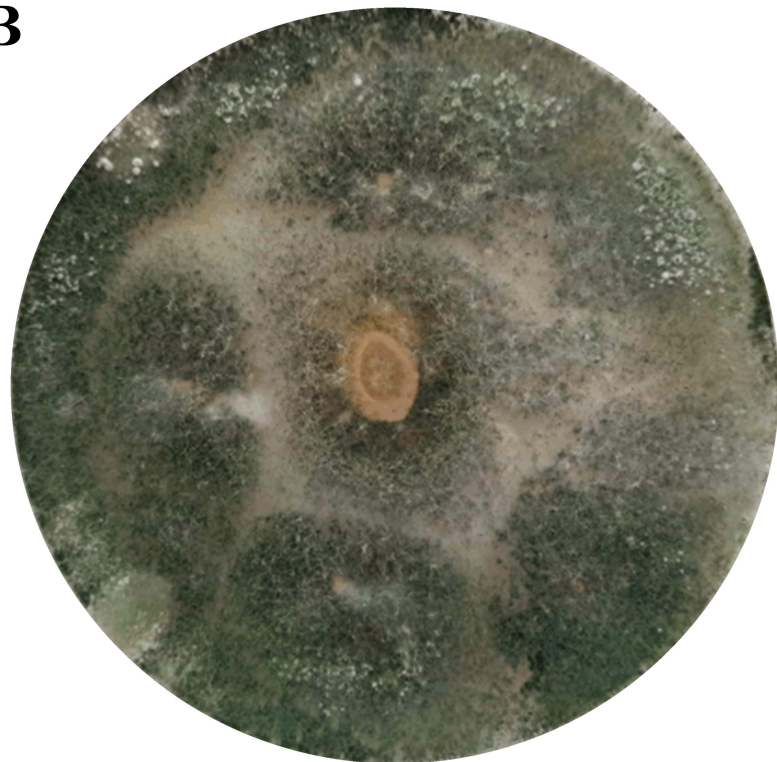

**Tr0711**

**C**

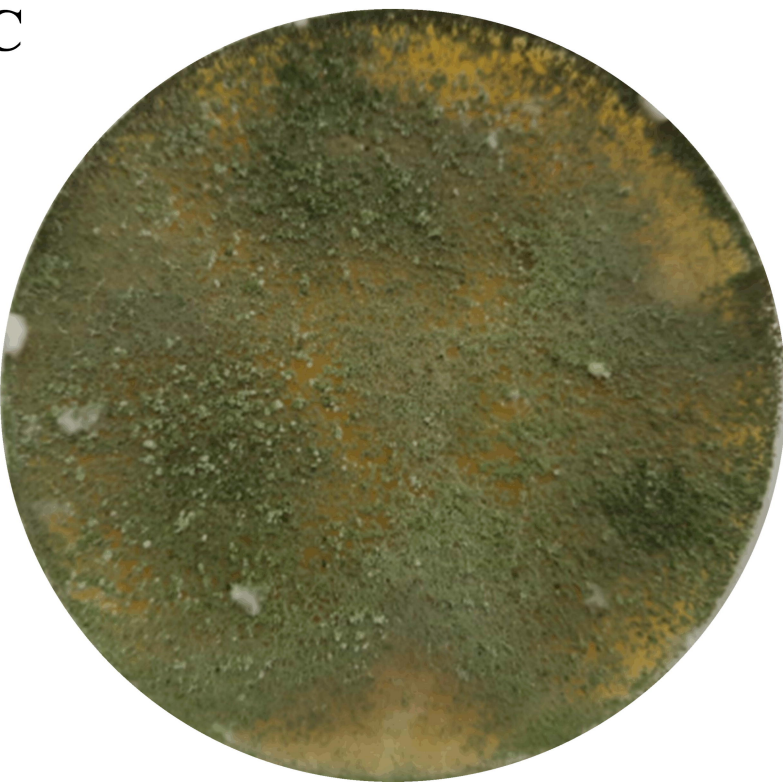

**Ta0020**

**D**

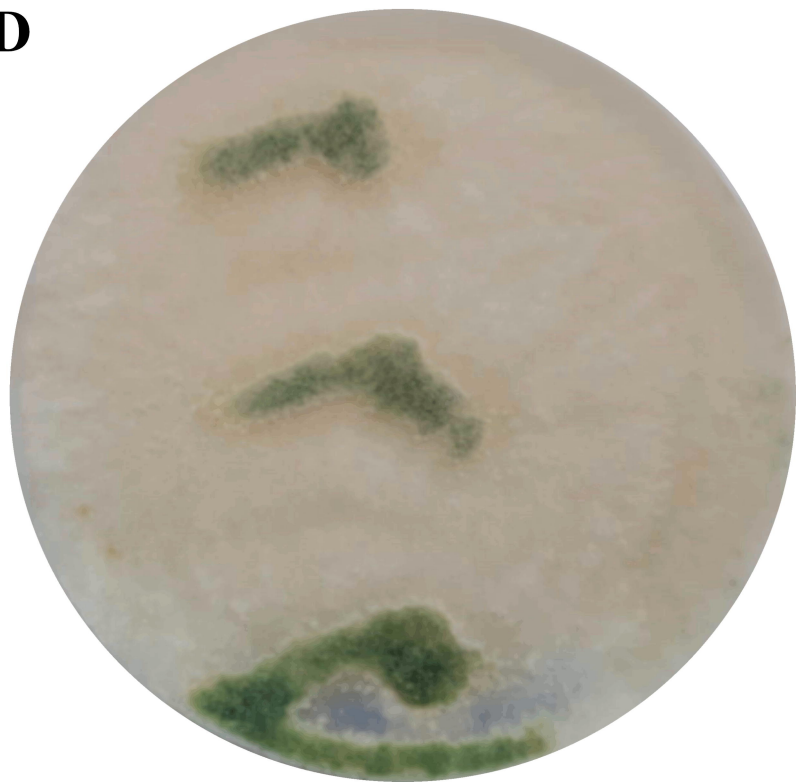

**A**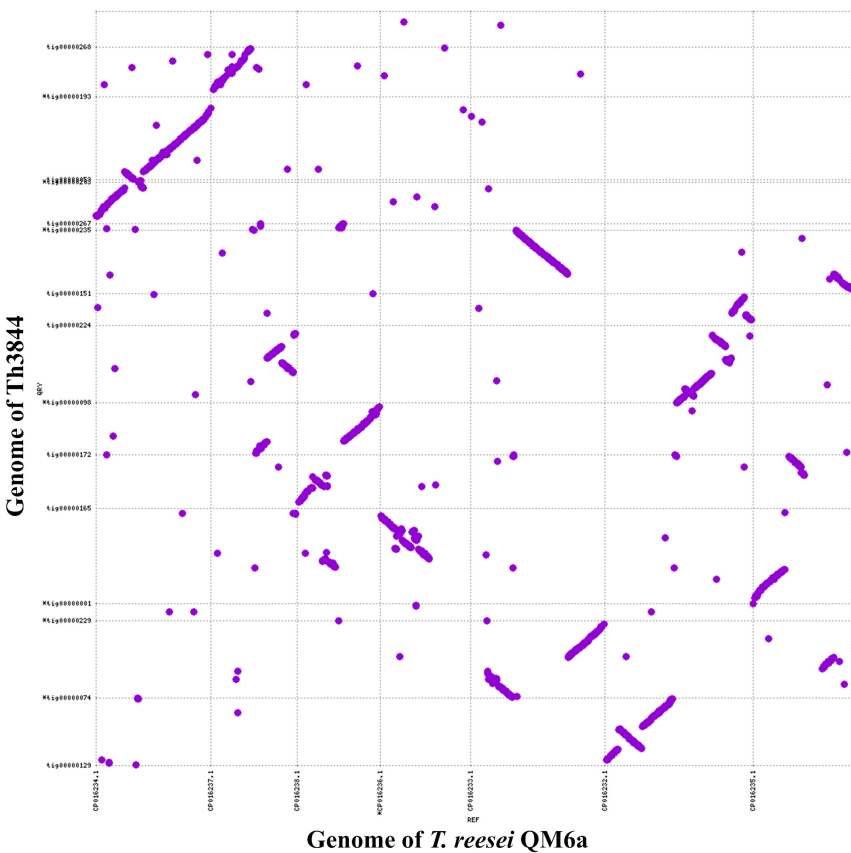**B**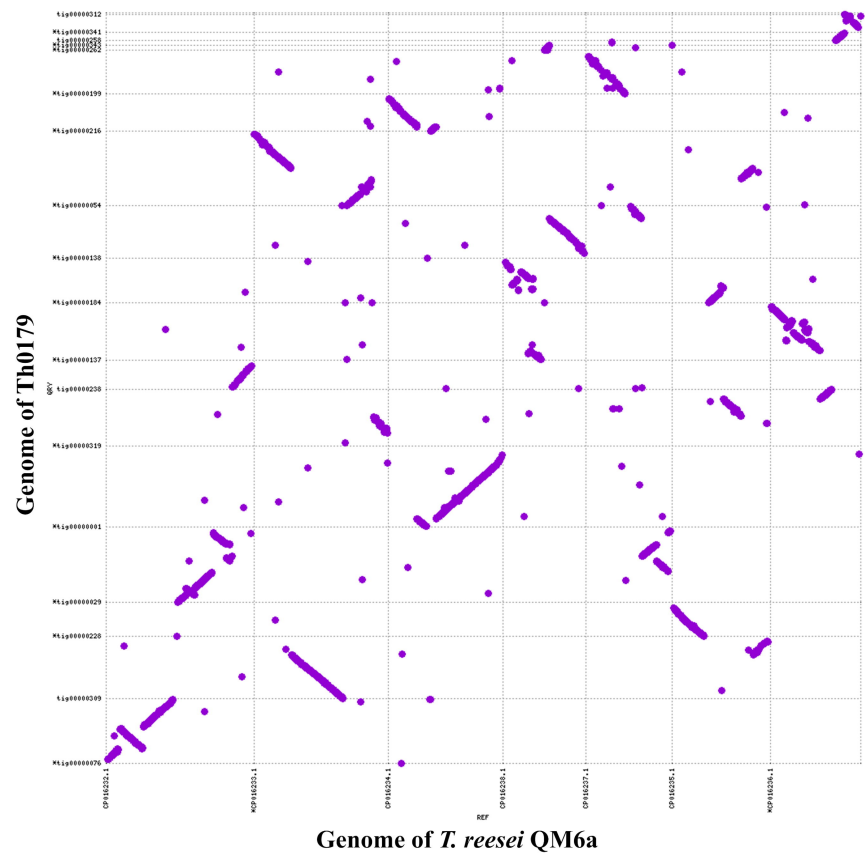**C**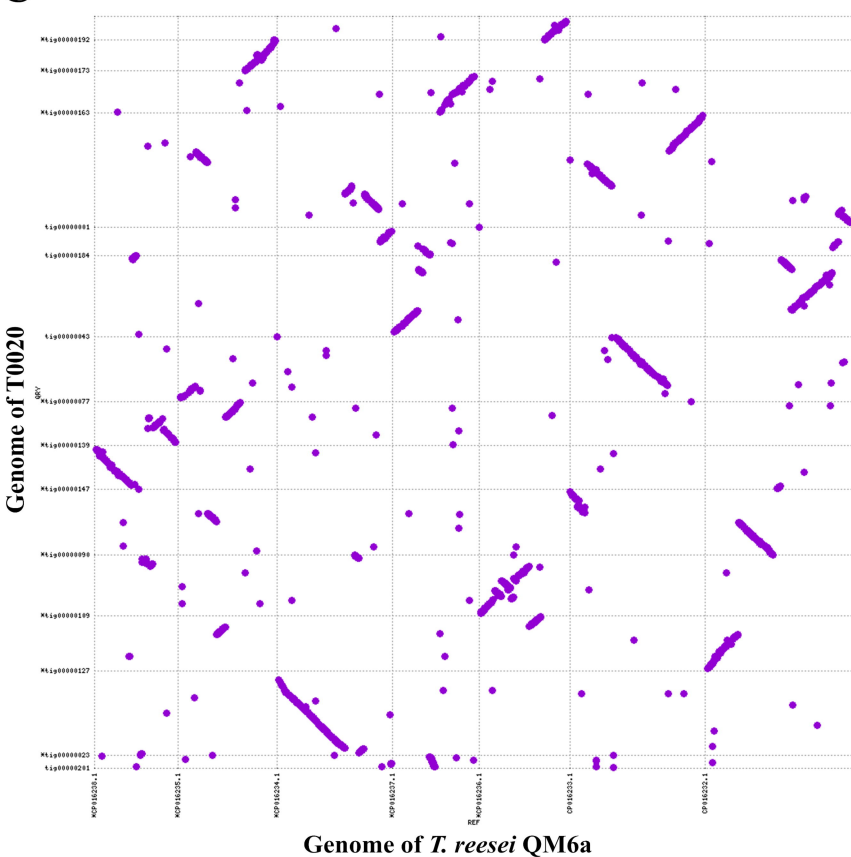**D**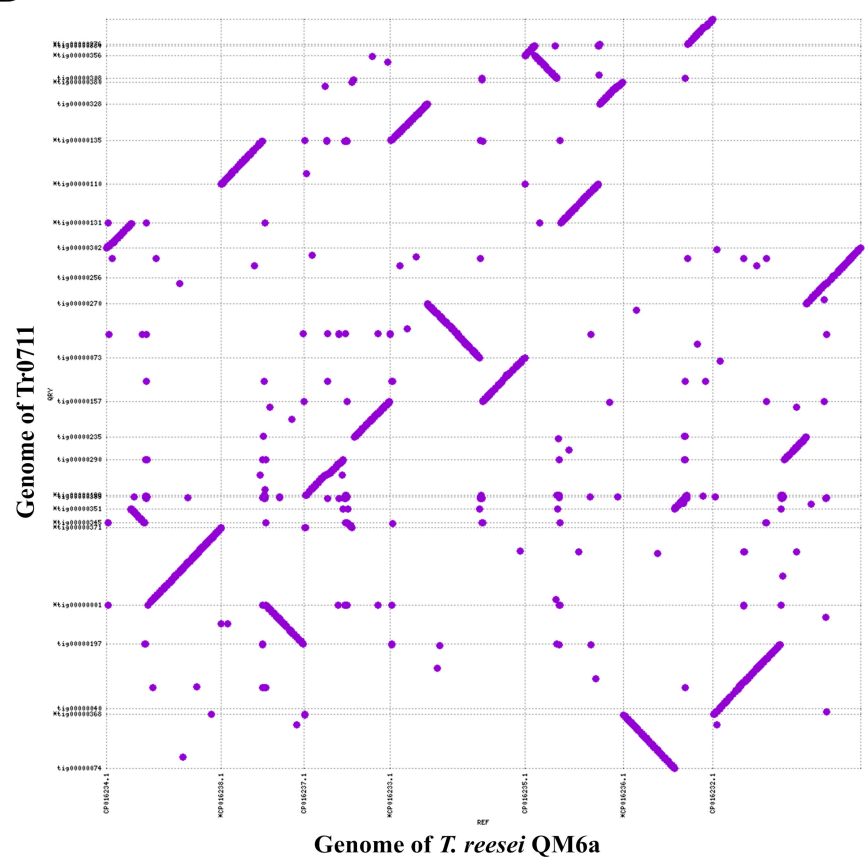

A

Th3844

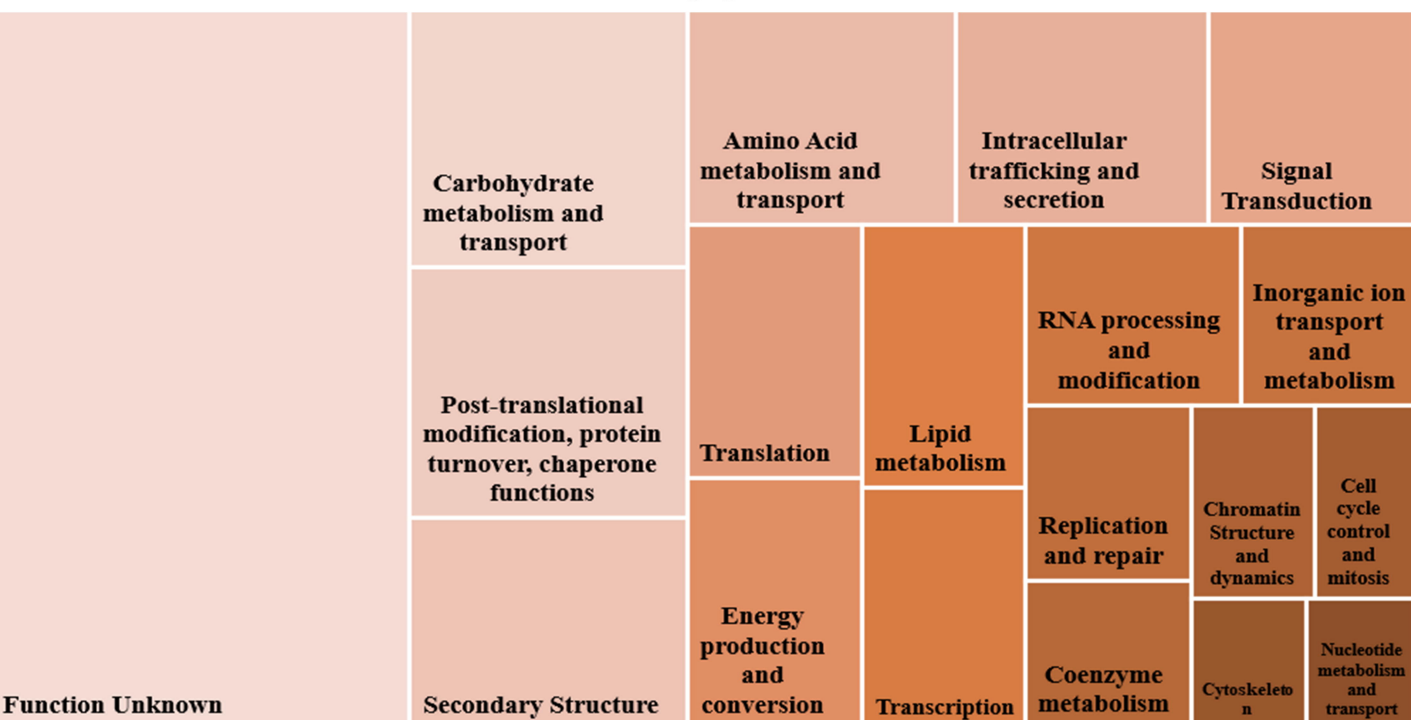

B

Th0179

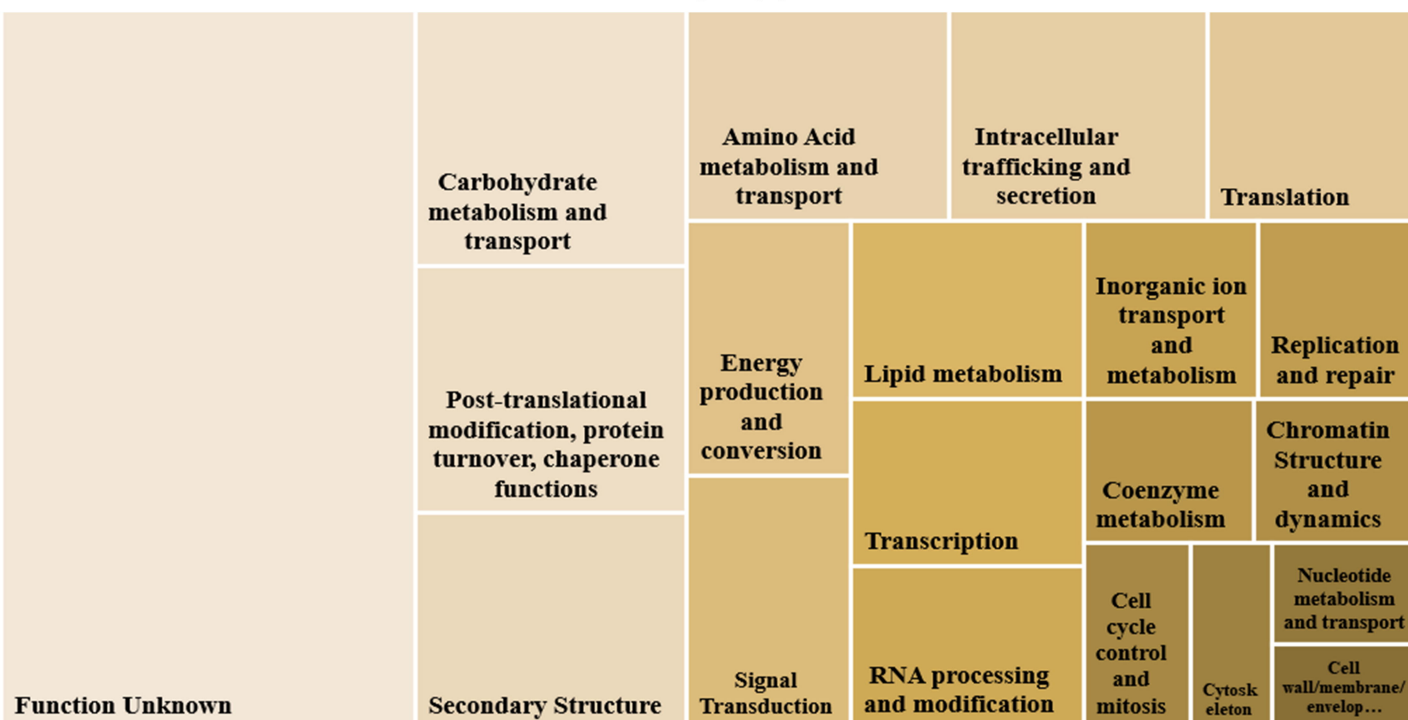

C

Ta0020

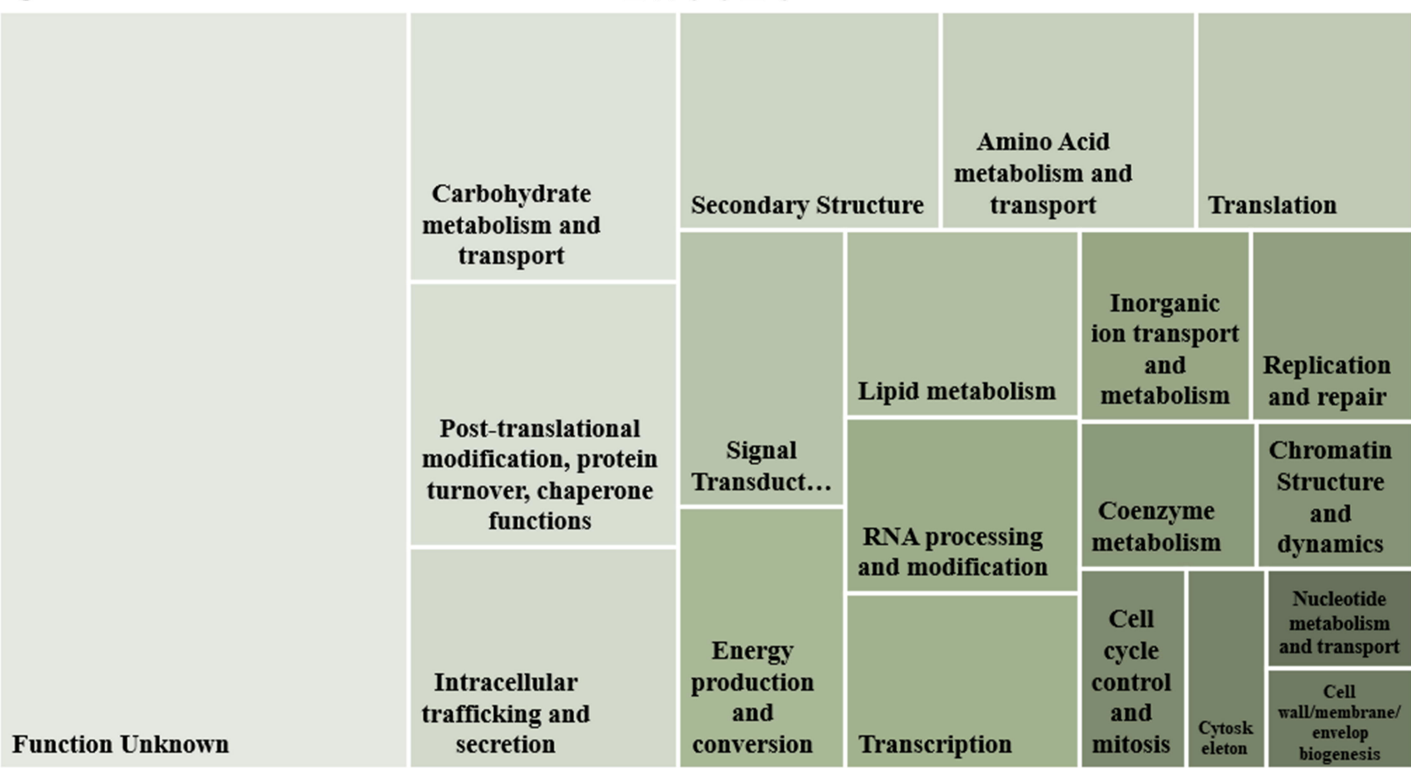

D

Tr0711

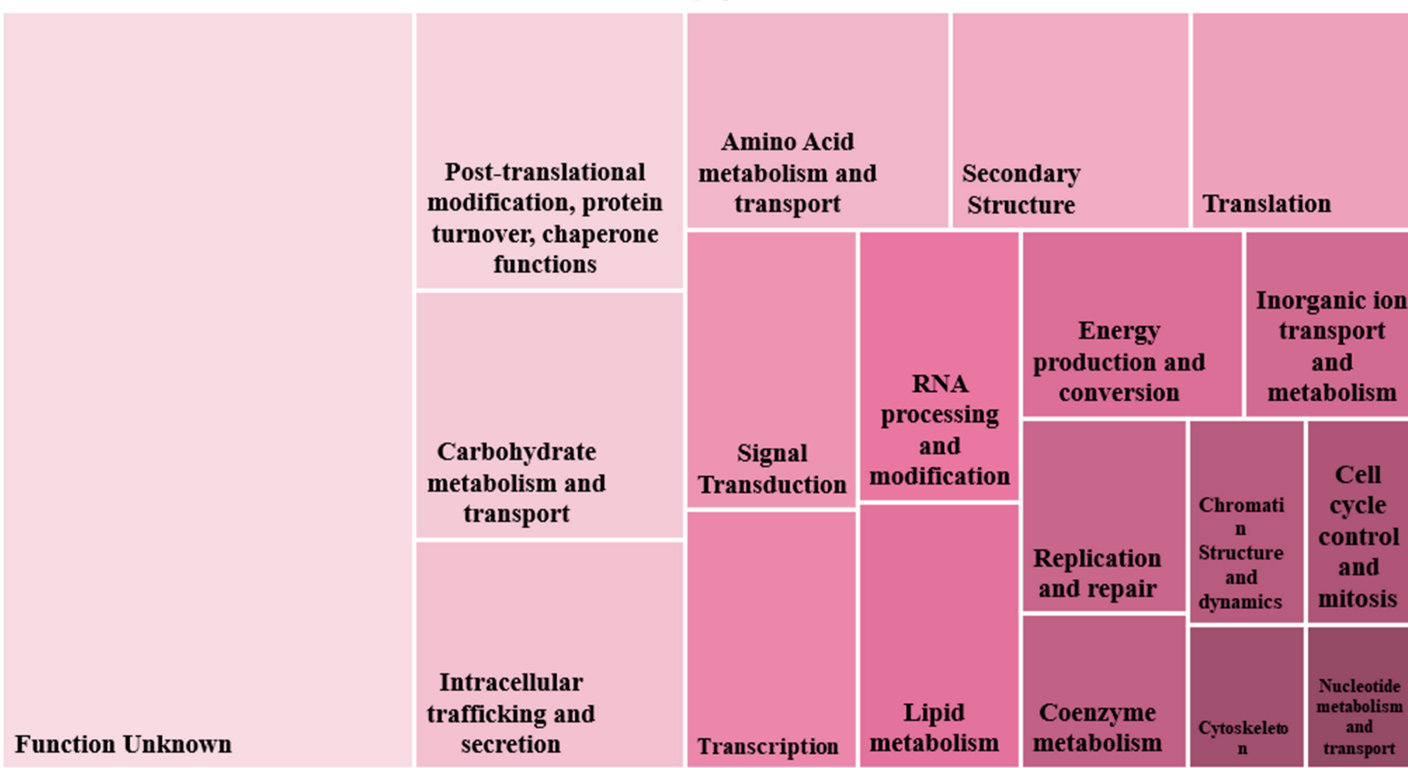

**A**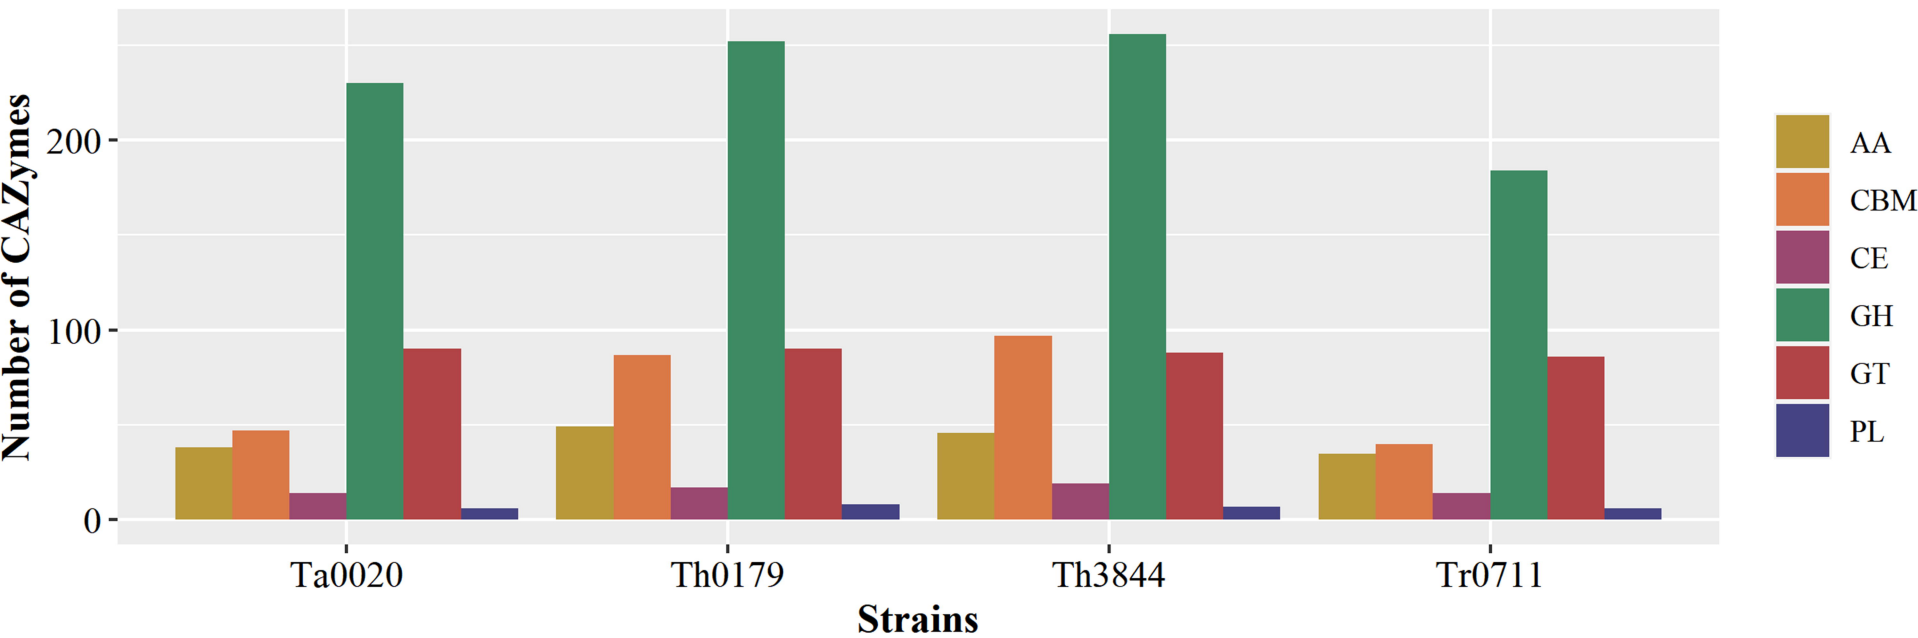**B**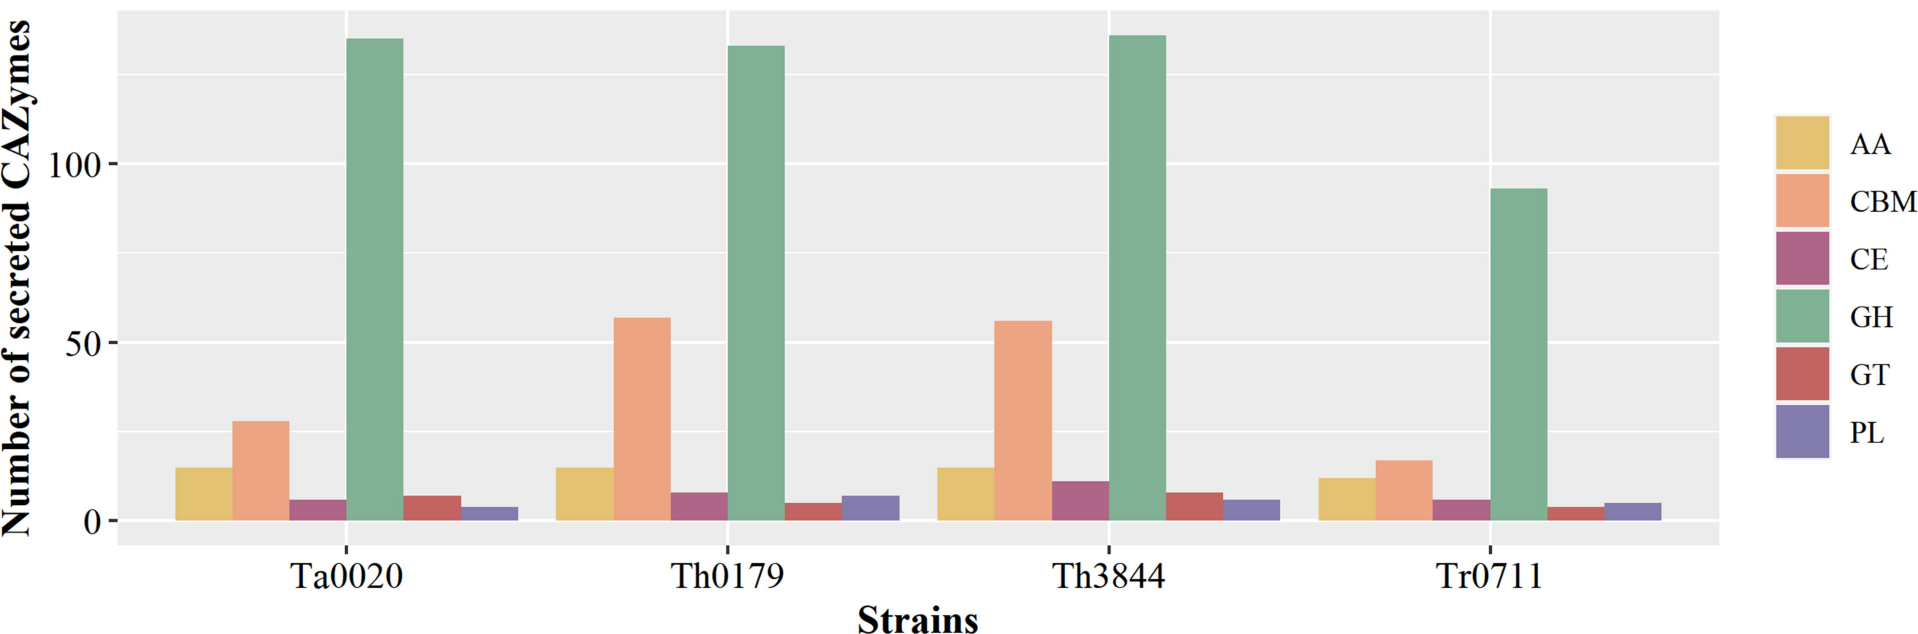



| Substrate/enzyme category          | Enzyme class                          | CAZy family | Th3844 | Th0179 | Ta0020 | Tr0711 |
|------------------------------------|---------------------------------------|-------------|--------|--------|--------|--------|
| Arabinan                           | Exo-arabinanases/Arabinofuranosidases | GH51        | 0      | 0      | 1      | 0      |
|                                    | Arabinofuranosidases                  | GH54        | 2      | 2      | 2      | 2      |
|                                    | Endoarabinanases                      | GH43        | 5      | 4      | 4      | 2      |
| Cellulose                          | Cellobiohydrolases                    | GH6         | 1      | 1      | 1      | 1      |
|                                    | Oligosaccharide oxidases              | AA7         | 2      | 3      | 1      | 1      |
|                                    | LPMOs                                 | AA9         | 3      | 3      | 3      | 3      |
|                                    | Endoglucanases                        | GH5         | 10     | 10     | 9      | 7      |
| Esterases                          | Feruloyl/p-coumaroyl/acetyl esterases | CE1         | 1      | 0      | 0      | 0      |
|                                    | 4-O-methyl-glucuronoyl esterases      | CE15        | 1      | 1      | 1      | 1      |
|                                    | Acetyl esterases                      | CE5         | 4      | 4      | 3      | 4      |
| Lignin                             | Glyoxal oxidases (GLOX)               | AA5         | 1      | 1      | 1      | 1      |
|                                    | 1,4-benzoquinone reductases           | AA6         | 1      | 1      | 1      | 1      |
|                                    | Vanillyl-alcohol oxidases             | AA4         | 2      | 3      | 0      | 0      |
|                                    | Peroxidases                           | AA2         | 1      | 3      | 5      | 3      |
|                                    | Laccases                              | AA1         | 9      | 9      | 6      | 4      |
| Lignin/Cellulose                   | Oxidoreductases/CDHs                  | AA3         | 19     | 20     | 12     | 12     |
| Monosugars                         | PDHs                                  | AA12        | 1      | 1      | 1      | 0      |
| Pectin                             | Pectin lyases                         | PL1         | 0      | 0      | 1      | 0      |
|                                    | Pectin methylesterases                | CE8         | 1      | 1      | 1      | 0      |
|                                    | Rhamnosidases                         | GH78        | 2      | 2      | 2      | 1      |
|                                    | Pectin lyases                         | PL20        | 2      | 2      | 2      | 2      |
|                                    | Polygalacturonases                    | GH28        | 5      | 5      | 5      | 4      |
| Soluble oligosaccharides           | $\beta$ -glucosidases                 | GH1         | 4      | 4      | 4      | 2      |
|                                    | Mannosidases                          | GH2         | 11     | 13     | 10     | 7      |
| Xylan                              | Xylanases                             | GH10        | 2      | 2      | 1      | 1      |
|                                    | LPMOs                                 | AA14        | 2      | 2      | 2      | 2      |
|                                    | Xylanases                             | GH11        | 4      | 4      | 4      | 3      |
| Xylosidases/ $\beta$ -glucosidases | Xylosidases/ $\beta$ -glucosidases    | GH3         | 16     | 17     | 15     | 12     |

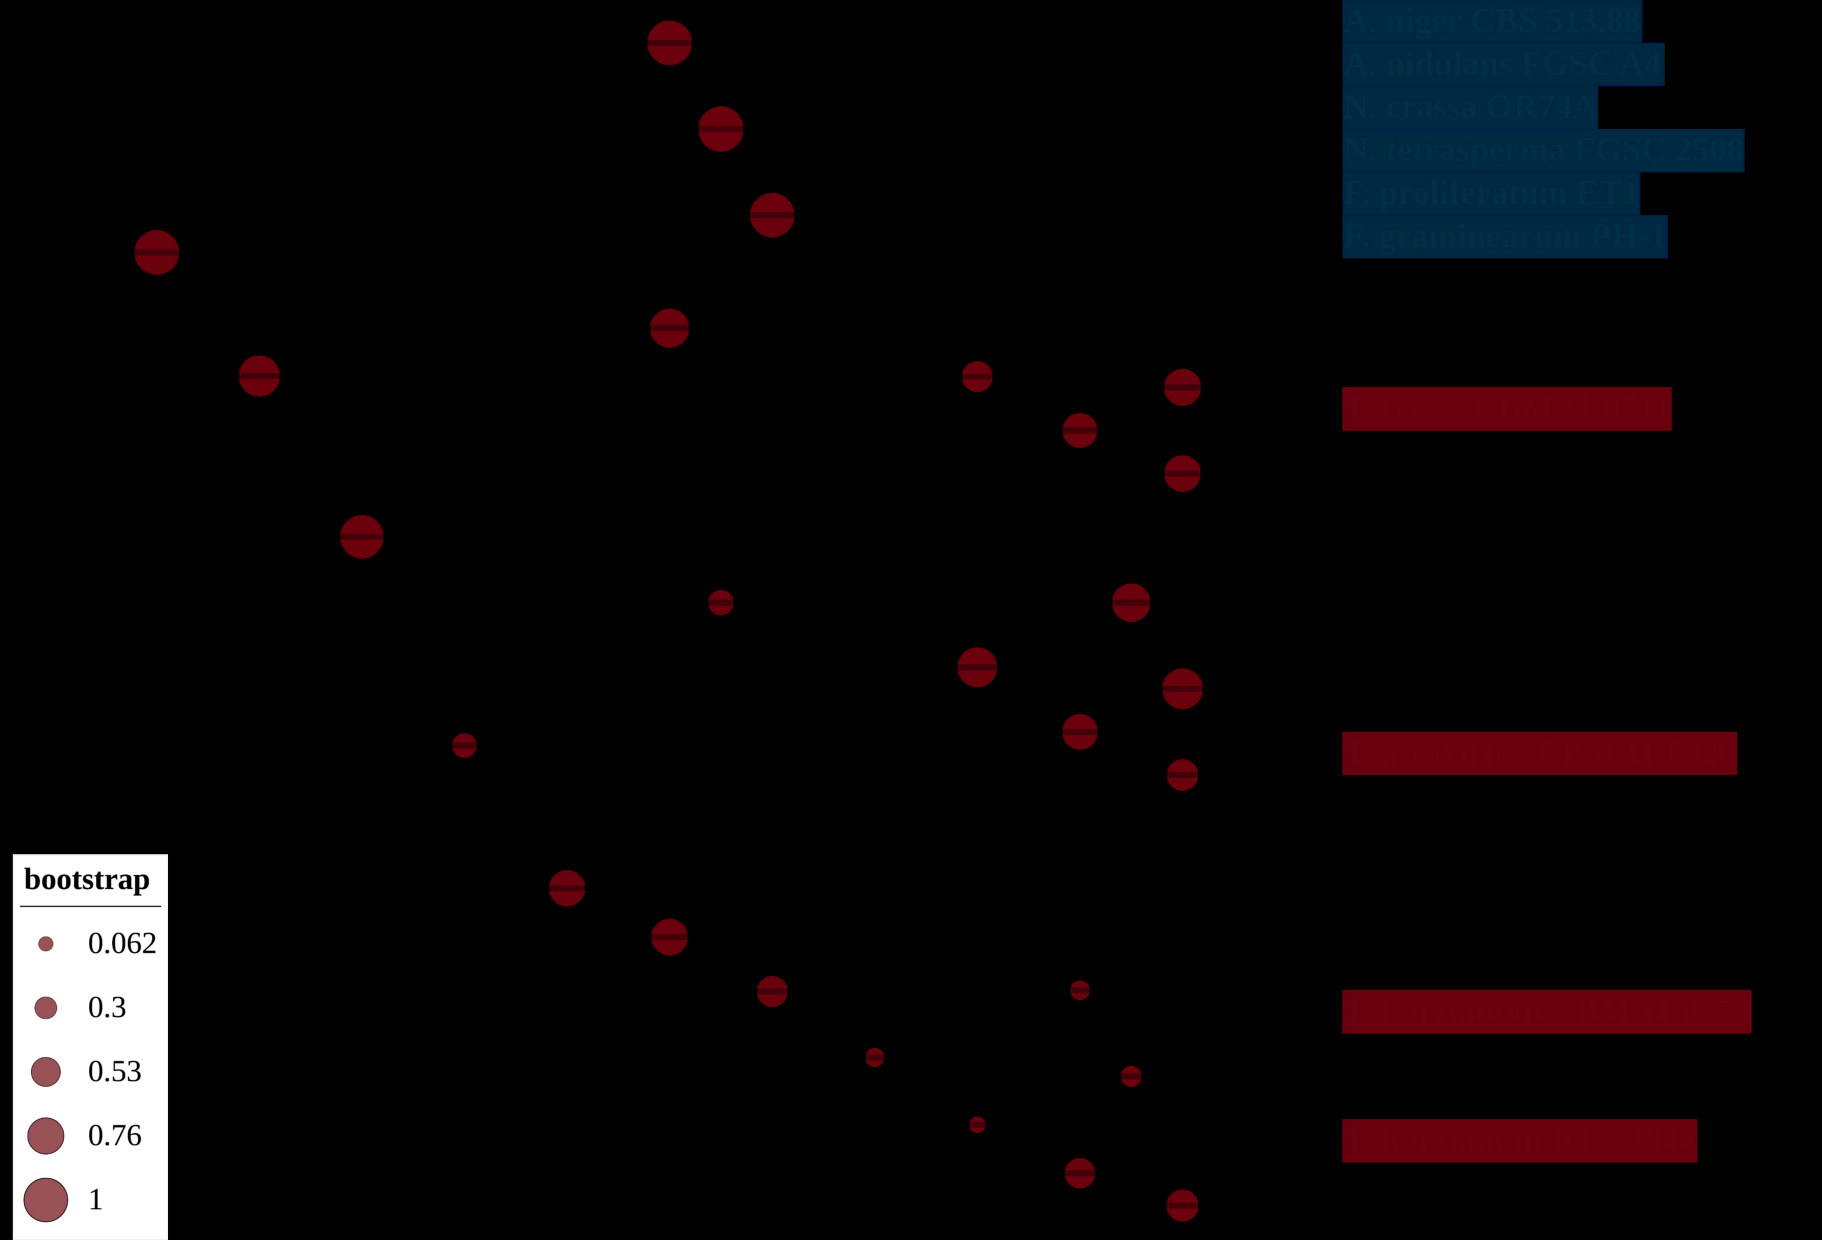

**bootstrap**

- 0.062
- 0.3
- 0.53
- 0.76
- 1

Kallima andamanensis  
Kallima andamanensis M1  
Kallima andamanensis M2  
Kallima andamanensis M3  
Kallima andamanensis M4  
Kallima andamanensis M5  
Kallima andamanensis M6  
Kallima andamanensis M7  
Kallima andamanensis M8  
Kallima andamanensis M9  
Kallima andamanensis M10  
Kallima andamanensis M11  
Kallima andamanensis M12  
Kallima andamanensis M13  
Kallima andamanensis M14  
Kallima andamanensis M15  
Kallima andamanensis M16  
Kallima andamanensis M17  
Kallima andamanensis M18  
Kallima andamanensis M19  
Kallima andamanensis M20  
Kallima andamanensis M21  
Kallima andamanensis M22  
Kallima andamanensis M23  
Kallima andamanensis M24  
Kallima andamanensis M25  
Kallima andamanensis M26  
Kallima andamanensis M27  
Kallima andamanensis M28  
Kallima andamanensis M29  
Kallima andamanensis M30  
Kallima andamanensis M31  
Kallima andamanensis M32  
Kallima andamanensis M33  
Kallima andamanensis M34  
Kallima andamanensis M35  
Kallima andamanensis M36  
Kallima andamanensis M37  
Kallima andamanensis M38  
Kallima andamanensis M39  
Kallima andamanensis M40  
Kallima andamanensis M41  
Kallima andamanensis M42  
Kallima andamanensis M43  
Kallima andamanensis M44  
Kallima andamanensis M45  
Kallima andamanensis M46  
Kallima andamanensis M47  
Kallima andamanensis M48  
Kallima andamanensis M49  
Kallima andamanensis M50  
Kallima andamanensis M51  
Kallima andamanensis M52  
Kallima andamanensis M53  
Kallima andamanensis M54  
Kallima andamanensis M55  
Kallima andamanensis M56  
Kallima andamanensis M57  
Kallima andamanensis M58  
Kallima andamanensis M59  
Kallima andamanensis M60  
Kallima andamanensis M61  
Kallima andamanensis M62  
Kallima andamanensis M63  
Kallima andamanensis M64  
Kallima andamanensis M65  
Kallima andamanensis M66  
Kallima andamanensis M67  
Kallima andamanensis M68  
Kallima andamanensis M69  
Kallima andamanensis M70  
Kallima andamanensis M71  
Kallima andamanensis M72  
Kallima andamanensis M73  
Kallima andamanensis M74  
Kallima andamanensis M75  
Kallima andamanensis M76  
Kallima andamanensis M77  
Kallima andamanensis M78  
Kallima andamanensis M79  
Kallima andamanensis M80  
Kallima andamanensis M81  
Kallima andamanensis M82  
Kallima andamanensis M83  
Kallima andamanensis M84  
Kallima andamanensis M85  
Kallima andamanensis M86  
Kallima andamanensis M87  
Kallima andamanensis M88  
Kallima andamanensis M89  
Kallima andamanensis M90  
Kallima andamanensis M91  
Kallima andamanensis M92  
Kallima andamanensis M93  
Kallima andamanensis M94  
Kallima andamanensis M95  
Kallima andamanensis M96  
Kallima andamanensis M97  
Kallima andamanensis M98  
Kallima andamanensis M99  
Kallima andamanensis M100

Kallima andamanensis

Kallima andamanensis

Kallima andamanensis

Kallima andamanensis

**A****Strains**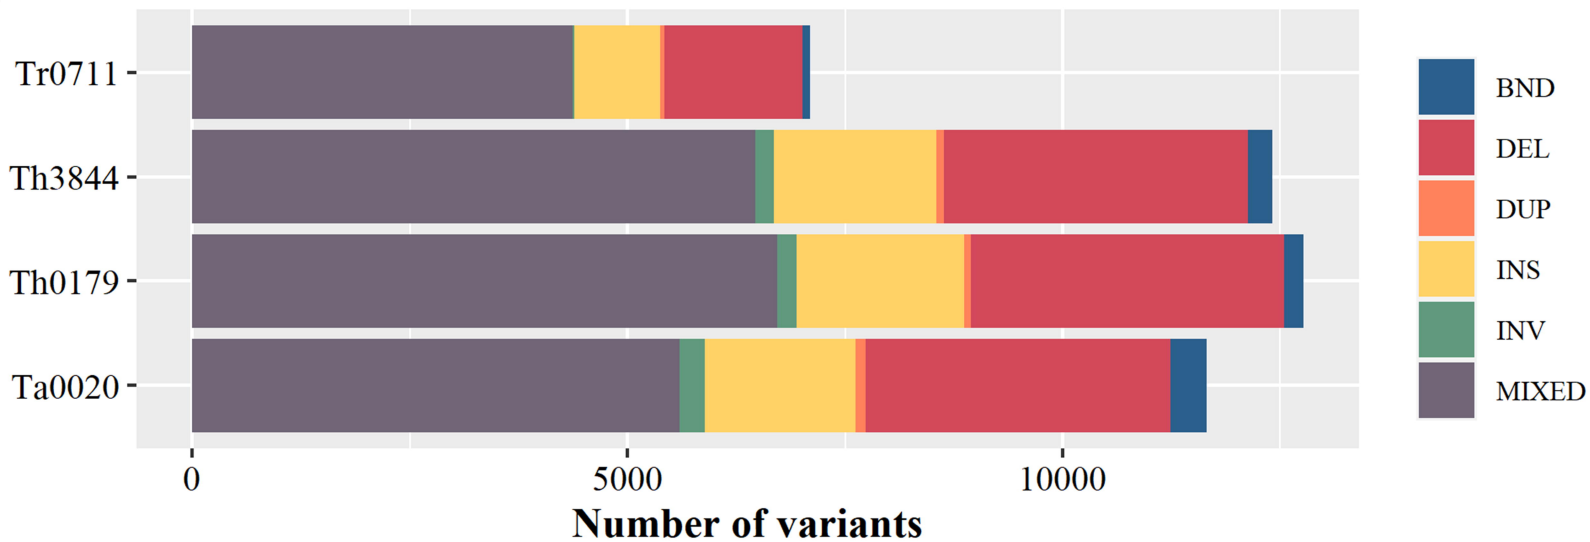**B****Number of effects by region**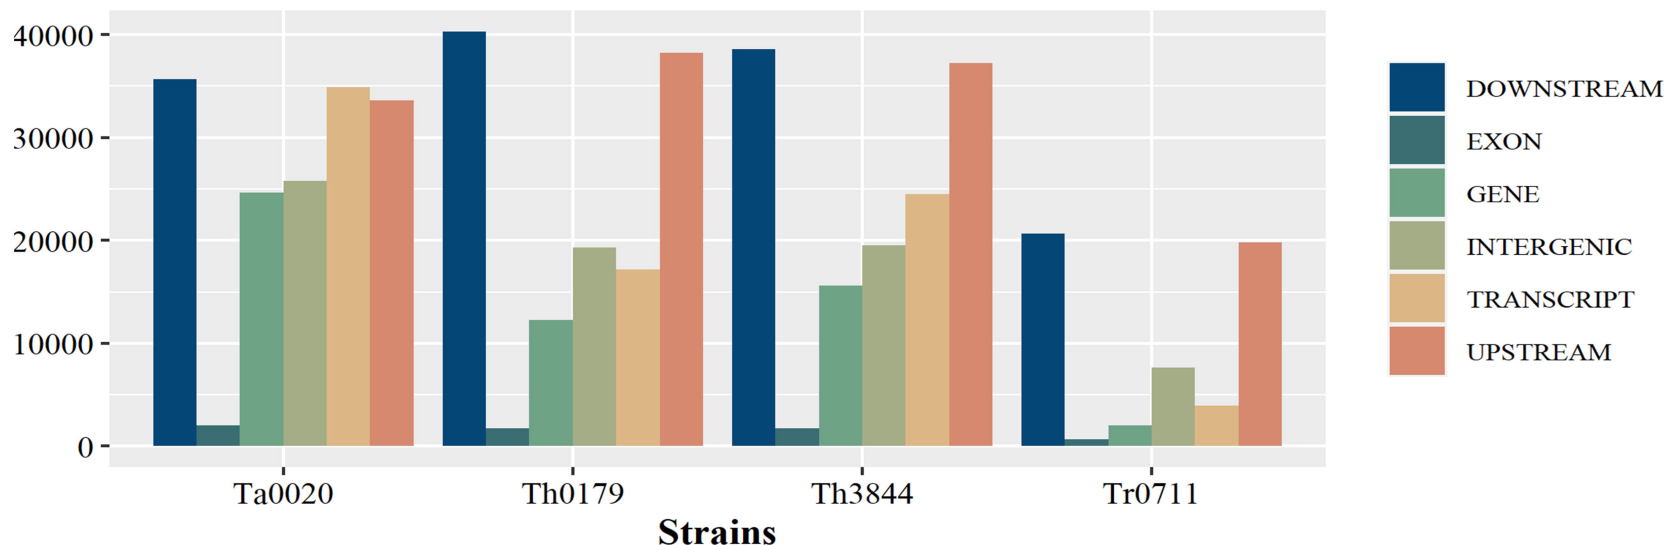

Source: https://www.biorxiv.org/content/10.1101/2022.02.11.479986v1.full.pdf
